1 **Decomposing the subclonal structure of tumors with two-way mixture**

2 **models on copy number aberrations**

3 An-Shun Tai<sup>1</sup>, Chien-Hua Peng<sup>1,\*</sup>, Shih-Chi Peng<sup>1</sup>, and Wen-Ping Hsieh<sup>1,\*</sup>

4 1. Institute of Statistics, National Tsing Hua University, Hsinchu, Taiwan,

5 R.O.C.

6

7

8 \* Corresponding author

9 Wen-Ping Hsieh<sup>1</sup> Institute of Statistics, National Tsing Hua University 101 sec. 2, Kwang-

10 Fu Rd. , Hsin-Chu City, Taiwan, R.O.C. 30013; TEL: 886-35715131-33188; FAX:886-

11 35728318;

12 E-mail:wphsieh@stat.nthu.edu.tw

13 Chien-Hua Peng<sup>1</sup> Institute of Statistics, National Tsing Hua University 101 sec. 2,

14 Kwang-Fu Rd. , Hsin-Chu City, Taiwan, R.O.C. 30013; TEL: 886-35715131-33195;

15 FAX:886-35728318;

16 E-mail: ariel0207@gmail.com

17

18

19

## 20 **Abstract**

21 Multistage tumorigenesis is a dynamic process characterized by the accumulation  
22 of mutations. Thus, a tumor mass is composed of genetically divergent cell subclones.  
23 With the advancement of next-generation sequencing (NGS), mathematical models  
24 have been recently developed to decompose tumor subclonal architecture from a  
25 collective genome sequencing data. Most of the methods focused on single-nucleotide  
26 variants (SNVs). However, somatic copy number aberrations (CNAs) also play critical  
27 roles in carcinogenesis. Therefore, further modeling subclonal CNAs composition  
28 would hold the promise to improve the analysis of tumor heterogeneity and cancer  
29 evolution. To address this issue, we developed a two-way mixture Poisson model,  
30 named CloneDeMix for the deconvolution of read-depth information. It can infer the  
31 subclonal copy number, mutational cellular prevalence (MCP), subclone composition,  
32 and the order in which mutations occurred in the evolutionary hierarchy. The  
33 performance of CloneDeMix was systematically assessed in simulations. As a result,  
34 the accuracy of CNA inference was nearly 93% and the MCP was also accurately  
35 restored. Furthermore, we also demonstrated its applicability using head and neck  
36 cancer samples from TCGA. Our results inform about the extent of subclonal CNA  
37 diversity, and a group of candidate genes that probably initiate lymph node metastasis  
38 during tumor evolution was also discovered. Most importantly, these driver genes are  
39 located at 11q13.3 which is highly susceptible to copy number change in head and neck  
40 cancer genomes. This study successfully estimates subclonal CNAs and exhibit the  
41 evolutionary relationships of mutation events. By doing so, we can track tumor  
42 heterogeneity and identify crucial mutations during evolution process. Hence, it

43 facilitates not only understanding the cancer development but finding potential  
44 therapeutic targets. Briefly, this framework has implications for improved modeling of  
45 tumor evolution and the importance of inclusion of subclonal CNAs.

46

## 47 **Introduction**

48 Cancer, a dynamic disease, is characterized by unusual cells with somatic  
49 mutations. These mutations are caused by environmental factors accumulated during  
50 an individual's lifetime; this accumulation of mutational events results in a large degree  
51 of genetic heterogeneity among cancer cells. The intratumor heterogeneity causes  
52 difficulties in devising personalized treatment strategies.

53 To decipher intratumor heterogeneity, understanding how cancer evolves is a key  
54 step. The hypothesis for the somatic evolution of cancer was proposed in the 1970s [1].  
55 It states that all tumor cells descend from a single founder cell, and cells with some  
56 advantageous mutations become more competitive than normal cells for growth and  
57 clonal expansion. This hypothesis could also be formed through random drift. Gradually,  
58 subsequent clonal expansion occurs, and the tumor evolves into an organization of  
59 multiple cell subpopulations. Understanding clonal evolution in cancer is one of the  
60 goals of cancer medicine [2]. Presently, sequencing technology enables performing a  
61 large-scale molecular profiling of tumors to comprehend cancer development and  
62 determine disease progression. However, the process of evolution is not directly  
63 observed because tissues for measuring somatic mutations are typically obtained from  
64 patients at a single time point. Thus, the ancestral relationship among tumor subclones

65 have to be inferred, and this is closely related to a well-studied problem, phylogenetic  
66 tree reconstruction. To construct a phylogenetic tree, the mutations in each cancer cell  
67 should be measured to infer evolutionary relationships among various cells. For  
68 addressing this concern, the current technology of single-cell sequencing seems  
69 appropriate [3, 4]. However, this technology is not widely used because of some  
70 technical limitations and financial considerations [5]. Most studies on tumor evolution  
71 rely on DNA sequencing technology with a bulk tumor containing genetically different  
72 cells. Therefore, the cellular prevalence of each subclone have to be measured through  
73 the relative read count information of the variants.

74 Single-nucleotide variants (SNVs) and copy number aberrations (CNAs) are  
75 widely used data types to study tumor evolution. Recently, studies inferring the  
76 population structure and clonal architecture have either focused on SNVs according to  
77 variant allele frequencies (VAFs) or on CNAs with read counts obtained through DNA  
78 sequencing [6, 7]. Methods for either type of data can adopt the other type of data to  
79 improve their reconstruction, and most methods have developed corresponding  
80 computational tools.

81 The first category of method reconstructs models with only SNV data. AncesTree  
82 and clonality inference in tumors using phylogeny (CITUP) are the representatives of  
83 this category, and they build models based on heterozygous SNV to study cancer  
84 progression, assuming that the copy number is two [8, 9]. To relax the assumption of  
85 the normal copy number status, many studies have included CNAs to correct the  
86 baseline [10-13]. For instance, Pyclone is one of the clonal inference approaches, and  
87 it applies a hierarchical Bayes binomial distribution to model allelic counts [13]. This

88 approach applies a Dirichlet process prior on group mutations and infers the posterior  
89 distribution to estimate the cellular prevalence, which is the fraction of cancer cells  
90 harboring a mutation.

91 Unfortunately, the aforementioned algorithms only considered abnormal copy  
92 number states but do not infer the clonal structure of copy number changes. If we do  
93 not account for clonal evolutionary architecture, the estimation of CNAs would be  
94 inaccurate and just reported as an average of the CNAs of all tumor subclones. Hence,  
95 in contrast to the SNV-based models, some studies focus on subclonal CNA  
96 heterogeneity [7, 14-18]. They recognize that subclonal CNAs could technically  
97 improve the analysis accuracy. THetA is one of the most popular tools for subclonal  
98 copy number decomposition [7]; it searches all possible combinations of copy numbers  
99 across all segments and applies the maximum likelihood approach to infer the most  
100 likely subclonal structures. However, THetA has an identifiability concern, such that  
101 several solutions of subclone structures and copy number status levels can explain the  
102 read-depth information equally well [15, 16].

103 Integrating other data, such as single-nucleotide polymorphisms, to jointly analyze  
104 tumor progression is a solution to the identification problem. The methods developed  
105 on the basis of these integrated data types constitute another category of cancer  
106 subclone reconstruction approaches [14-18]. In 2014, Oesper et al. modified THetA to  
107 THetA2, which designs a probabilistic model of B-allele frequencies (BAFs) to solve  
108 the identification problem and simultaneously improves the efficiency of the algorithm  
109 [14]. Furthermore, PyLOH resolves the identifiability problem by integrating CNAs  
110 and loss of heterozygosity (LOH) within a unified probabilistic model [15]. PyLOH

111 aims at determining the contamination from normal cells and evaluating tumor purity,  
112 which is the fraction of tumor cells within a tumor tissue. Instead of tumor purity,  
113 MixClone improves PyLOH with a more delicate measurement of tumor progression,  
114 the subclonal cellular prevalence (SCP) [16]. The major concept of PyLOH and  
115 MixClone is to use the Poisson and binomial models simultaneously to analyze the read  
116 depth and BAFs.

117 Most of the above mentioned methods that reconstruct the process of copy number  
118 evolution assume heterozygous SNV sites within chromosome segments. This  
119 assumption facilitates the decomposition of clonal CNAs, but it ignores segments  
120 without any somatic SNVs. Therefore, to more effectively address this concern, we  
121 developed a new algorithm, called CloneDeMix, which considers subclonal copy  
122 number changes when inferring the clonal evolutionary structures. It requires only the  
123 read-depth information of loci of any sizes no matter SNVs are included or not. The  
124 input can be a predefined segment of the chromosome or simply a single nucleotide  
125 locus. CloneDeMix is a two-way clustering model that clusters each locus into an  
126 appropriate copy number state and a most likely clonal group. The procedure can  
127 simultaneously evaluate all loci and regions. The algorithm uses information from all  
128 samples and loci simultaneously to infer clone progression and can efficiently reduce  
129 the identification bias. The flowchart of CloneDeMix is demonstrated in Fig 1.

130 In this study, we demonstrated the performance of the algorithm with simulation  
131 data and applied it to a head and neck cancer dataset from The Cancer Genome Atlas  
132 (TCGA) and primary esophageal squamous cell carcinoma (ESCC) [19]. The  
133 simulation demonstrated the accuracy of clone identification and subclonal copy

134 number change detection, particularly in early mutational events, which could be the  
135 candidate of driver mutations. The specificity of the copy number detection exceeded  
136 98%, and the sensitivity was nearly 93.5%. These simulations support that our approach  
137 can successfully identify the copy number mutation and deconvolute its amplification  
138 or deletion state from the clonal architecture.

139 Our results obtained for 75 paired normal–tumor samples recapitulated most of the  
140 findings reported in head and neck cancer [20-23]. The novel subclonal CNAs have  
141 also been identified, and their subclonal structure has been shown to facilitate the  
142 discovery of driver mutations for advanced tumor progression. Furthermore, we  
143 provide evidence for the association between tumor heterogeneity and metastasis. A  
144 large heterogeneity tends to promote tumor metastasis. To sum up, CloneDeMix  
145 demonstrated ability to accurately identify subclonal CNAs and clarify intratumor  
146 heterogeneity. It is useful complement to other methods for cancer evolution studies.

147

148

### **Fig 1. Flowchart of CloneDeMix**

Our approach includes three main steps, data preparation, running CloneDeMix, and inference of tumor heterogeneity.

149

150

## **151 Methods**

## 152 **Two-way Poisson mixture model**

153 We delineated the structure of cellular evolution based on two concepts: SCP and  
154 mutational cellular prevalence (MCP), as shown in Fig 2. The SCP is defined as the  
155 fraction of cells that are relatively homogeneous and carry the same set of mutations.  
156 The MCP is defined as the fraction of cells that carry a certain mutation. The SCPs can  
157 be added to match the MCPs according to the evolutionary structure of subclones (Fig  
158 3A). The evolution matrix, an upper triangular matrix, in Fig 3A provides information  
159 on the ancestral relationship among the subclones. There are five subclones in this toy  
160 example and their relationship is shown in the evolution tree in Fig 3A. The percentages  
161 indicate the corresponding SCPs. In this evolutionary structure, six mutations create  
162 five subclones. For example, locus A exists in every tumor subclone because of its  
163 presence at the top of the tree. Hence, the MCP of this locus can be calculated as the  
164 sum of all SCPs. By contrast, locus G is a later mutation and only exists in the leaf  
165 subclone C4. The corresponding MCP is equal to the SCP of C4.

166

### **Fig 2. Illustration of SCP and MCP**

A tissue has two decompositions. Panel (A) provides an overhead view that divides the cells into several disjoint groups according to their mutations. The cells in the same group are relatively homogeneous and carry the same set of mutations. The size of a group or the fraction of cells is called the SCP. In contrast to the SCP, panel (B) demonstrates the MCP, which is defined as the fraction of cells carrying a certain mutation.

167

### **Fig 3. Two-way mixture model for inferring tumor progression by using copy numbers**



(A) A toy example for tumor progression of five distinct subclones. Six of the ten loci (A, B, E, F, G, and J) have gained or lost copy numbers, and the remaining loci (C, D, H, and I) show no copy number change. The mutation in each locus forms a new subclone. MCPs can be determined by multiplying the SCP and evolution matrix. (B) The copy number status of each locus is listed in the table, and the MCP of each locus is listed under the table. (C) Each locus belongs to one of the 21 clusters in CloneDeMix. The columns represent five MCP levels, and the rows represent five copy number states considered in the example.

168

169       The read depth of each locus is proportional to the copy number and MCP. To  
170 delineate the read depth of each somatic copy number variant into its copy number state  
171 and MCP, this study proposes a two-way mixture model (CloneDeMix). Any locus in a  
172 sample has only two states, namely normal and mutated states; the proportion of both  
173 types differs across different loci. For example, locus E shows copy number changes in  
174 subclone C2 but not in the other subclones (Fig 3B). Hence, all other subclones  
175 comprise the normal allele for locus E. Furthermore, locus F has copy number changes  
176 in C3, C4, and C5; hence, it is classified as normal in subclones C1 and C2.  
177 CloneDeMix clusters all loci according to their copy number state and MCP. As shown  
178 in Fig 3C, all loci in this case are classified into five copy number states and  
179 simultaneously into five MCP levels. This results in 21 groups because we could not  
180 distinguish the MCP levels for the loci of two copies. The MCPs for the five MCP  
181 groups are unknown and have to be estimated. Thus, CloneDeMix provides the copy  
182 number and MCP for each locus.

183       The input in CloneDeMix is the read depth of each analyzed locus. When the locus  
184 represents a segment, such as an exon or a predefined amplicon, the average read depth  
185 is adopted. Let  $X_i$  be the read depth of locus  $i$  or the average read depth rounded to the

186 closest integer in region  $i$ , and assume that it follows a two-way mixture Poisson  
187 distribution.

$$188 \quad P(X_i | \{r_h\}, \{\pi_{kh}\}, a_{base,i}) = \sum_{k=1}^{m_1} \sum_{h=1}^{m_2} \pi_{kh} f_{kh}(X_i | r_h, a_{base,i}) \quad \forall i$$

189 Each component  $f_{kh}(X_i)$  in the model represents the distribution of read depths  
190 sampled from the  $k$ -th and  $h$ -th groups of the copy number state and MCPs, respectively.  
191 The read count for each combined group is specified as a Poisson distribution; the mean  
192 of this distribution is proportional to a function of the mutated copy number and the  
193 MCP. It is specified as

$$194 \quad \mu_{hk} = a_{base,i} \times (2(1 - r_h) + c_k r_h),$$

195 where  $r_h$  is the MCP for the  $h$ -th group,  $c_k$  is the copy number of the  $k$ -th copy number  
196 group, and  $a_{base,i}$  is a normalization number for locus  $i$ . The corresponding mixture  
197 weight is denoted as  $\pi_{kh}$ . Without further evidence, the copy number of the normal cells  
198 can be considered to be two in CloneDeMix. The number of groups for copy numbers  
199 and cellular proportions are pre-specified as  $m_1$  and  $m_2$ , respectively; we select  $m_1$  and  
200  $m_2$  according to the Akaike information criterion (AIC).

201

## 202 **Estimating MCPs and copy number by using expectation–** 203 **maximization algorithm**

204 The parameters of CloneDeMix include the normalization constants  $a_{base,i}$ , MCPs  
205  $\mathbf{r} = \{r_h\}$ , and weights  $\mathbf{\Pi} = \{\pi_{kh}\}$ . The plug-in estimator of  $a_{base,i}$  is estimated from the  
206 paired normal sample of each tumor sample. Because all samples are assumed to be

207 globally normalized, and the sample-specific variation is removed before the analysis,  
 208 the read depth of locus  $i$  in the normal sample represents an unbiased estimator of the  
 209 mean read depth in the tumor sample when the copy number is two. Hence, we use half  
 210 of the read depth of locus  $i$  in the paired normal sample as the estimator of  $a_{base,i}$ . In  
 211 case of no paired normal sample, we suggest taking half of the sample mean across all  
 212 existing normal samples to estimate  $a_{base,i}$ . All other parameters are estimated using the  
 213 expectation–maximization (EM) algorithm to approximate the maximum likelihood  
 214 estimation (MLE).

215 We introduce a sequence of latent binary variables for locus  $i$ . Variables  $Y_i =$   
 216  $\{Y_{ikh}\}_{k=1,\dots,m_1;h=1,\dots,m_2}$  take the value of 0 or 1, indicating the memberships of the copy  
 217 number and MCP groups for locus  $i$ . If  $Y_{ikh} = 1$ , then  $X_i|Y_{ikh} = 1, c_k, r_h, \hat{a}_{base,i}$  has  
 218 the following distribution

$$f_{kh}(X_i) = \text{Poisson}\left(X_i|\mu_{hk} = \hat{a}_{base,i} \times (2(1 - r_h) + c_k r_h)\right). \quad (2)$$

219 A complete form of the conditional distribution is

$$P(X_i|Z_i, Y_i, \tilde{r}, \hat{a}_{base,i}) = \prod_h \prod_k f_{kh}(X_i|\hat{a}_{base,i})^{Y_{ikh}}. \quad (3)$$

220 According to the mixture model construction, the probability of  $Y_{ikh} = 1$  is  $\pi_{kh}$ .

221 Specifically,

$$P(Y_{ikh} = 1) = \pi_{kh} \text{ for each locus } i. \quad (4)$$

222 Hence, the density functions of  $Y_i = \{Y_{ikh}\}_{k=1,\dots,m_1;h=1,\dots,m_2}$  follow multinomial  
 223 distributions with probability functions

$$P(Y_i|\Pi) = \prod_h \prod_k \pi_{kh}^{Y_{ikh}}. \quad (5)$$

224 According to the definition of conditional probability, the joint density function of

225  $X_i$  and  $Y_i$  can be written as follows:

$$\begin{aligned}
 P(X_i, Y_i | \Pi, \tilde{r}, \hat{a}_{base,i}) &= P(X_i | Y_i, \tilde{r}, \hat{a}_{base,i}) P(Y_i | \Pi) \\
 &= \prod_h \prod_k f_{kh}(X_i | \hat{a}_{base,i})^{Y_{ikh}} \prod_h \prod_k \pi_{kh}^{Y_{ikh}} \\
 &= \prod_h \prod_k [\pi_{kh} f_{kh}(X_i | \hat{a}_{base,i})]^{Y_{ikh}}.
 \end{aligned} \tag{6}$$

226 The log likelihood of  $\Pi$  and  $\tilde{r}$  is

$$\begin{aligned}
 l(\Pi, \tilde{r} | X, Y) &= \log \prod_i P(X_i, Y_i | \Pi, \tilde{r}, \hat{a}_{base,i}) \\
 &= \sum_i \sum_h \sum_k Y_{ikh} \log(f_{kh}(X_i | \hat{a}_{base,i}) \pi_{kh})
 \end{aligned} \tag{7}$$

227 Because there is no closed form for the maximum likelihood estimator of  $\Pi$  and  
 228  $\tilde{r}$ , we adopted the EM algorithm to determine the MLE. The EM algorithm iteratively  
 229 maximizes the expected log likelihood in two steps: E and M steps.

230 The E step of the EM algorithm determines the expected value of the log likelihood  
 231 over the value of the latent variable  $Y$ , given the observed data  $X$  and current parameter  
 232 value  $\Pi = \Pi^0$  and  $\tilde{r} = \tilde{r}^0$ . Thus, we derive the following equation:

$$\begin{aligned}
 &E_{Y|\Pi^0, c, \tilde{r}^0, X} [l(\Pi, \tilde{r} | X, Z, Y)] \\
 &= E_{Y|\Pi^0, c, \tilde{r}^0, X} [\sum_i \sum_h \sum_k Y_{ikh} \log(f_{kh}(X_i | \hat{a}_{base,i}) \pi_{kh})] \\
 &= \sum_i \sum_h \sum_k E_{Y|\Pi^0, c, \tilde{r}^0, X} [Y_{ikh} \log(f_{kh}(X_i | \hat{a}_{base,i}) \pi_{kh})] \\
 &= \sum_i \sum_h \sum_k E_{Y|\Pi^0, c, \tilde{r}^0, X} [Y_{ikh}] \times \log(f_{kh}(X_i | \hat{a}_{base,i}) \pi_{kh})
 \end{aligned} \tag{8}$$

233 According to the definition of  $Y_{ikh}$ ,

$$\begin{aligned}
 E_{Y|\Pi^0, X} [Y_{ikh}] &= 1 \times P(Y_{ikh} = 1 | \Pi^0, X) + 0 \times P(Y_{ikh} = 0 | \Pi^0, X) \\
 &= \frac{P(X_i | \Pi^0, c, \tilde{r}^0, Y_{ikh} = 1) \times P(Y_{ikh} = 1 | \Pi^0)}{P(X_i | \Pi^0)} \\
 &= \frac{P(X_i | \Pi^0, c, \tilde{r}^0, Y_{ikh} = 1) \times P(Y_{ikh} = 1 | \Pi^0)}{\sum_k \sum_h [P(X_i | c, \tilde{r}^0, \Pi^0, Y_{ikh}) P(Y_{ikh} | \Pi^0)]}
 \end{aligned}$$

$$= \frac{f_{kh}(X_i | \hat{a}_{base,i}) \times \pi_{kh}^0}{\sum_k \sum_h [f_{kh}(X_i | \hat{a}_{base,i}) \times \pi_{kh}^0]} \quad (9)$$

234 Let  $E_{Y|\Pi^0, X}[Y_{ikh}] = Y_{ikh}^0$  and substitute it into equation (8); with some  
235 arrangement, we obtain

$$\begin{aligned} & E_{Y|\Pi^0, c, \tilde{r}^0, X} [l(\Pi, \tilde{r} | X, Z, Y)] \\ &= \sum_i \sum_h \sum_k E_{Y|\Pi^0, c, \tilde{r}^0, X}[Y_{ikh}] \times \log(f_{kh}(X_i | \hat{a}_{base,i}) \pi_{kh}) \\ &= \sum_i \sum_h \sum_k Y_{ikh}^0 \times \log(f_{kh}(X_i | \hat{a}_{base,i}) \pi_{kh}) \\ &= \sum_i \sum_h \sum_k Y_{ikh}^0 \times [\log(f_{kh}(X_i | \hat{a}_{base,i})) + \log(\pi_{kh})] \end{aligned} \quad (10)$$

236 The M step of the EM algorithm maximizes equation (10) over  $\Pi, \tilde{r}$  to determine  
237 the next estimates (e.g.,  $\Pi^1$  and  $\tilde{r}^1$ ). The maximization over  $\Pi$  involves only the  
238 second term in equation (10):

$$\pi_{kh}^1 = \underset{\pi_{kh}}{\operatorname{argmax}} (\sum_i \sum_h Y_{ikh}^0 \times \log(\pi_{kh})) \text{ under } \sum \pi_{kh} = 1 \quad (11)$$

239 The solution is  $\pi_{kh}^1 = \sum_{i=1}^n Y_{ikh}^0 / n$ . The maximization of  $\tilde{r}$  concerns the first  
240 term of equation (10), and the solution has no closed form. Numeric algorithms, such  
241 as the Newton–Raphson method, are required to solve the equation. We used the  
242 Newton–Raphson method with the R function *optim()*, and the iterative algorithm for  
243  $\tilde{r}$  is

$$\begin{aligned} \tilde{r}^1 &= \underset{\tilde{r}}{\operatorname{argmax}} \left( \sum_i \sum_h Y_{ikh}^0 \times \log(f_{kh}(X_i | \hat{a}_{base,i})) \right) \\ &= \underset{\tilde{r}}{\operatorname{argmax}} \left( \sum_i \sum_h Y_{ikh}^0 \times [-\hat{a}_{base,i} \times (2(1 - r_h) + c_k r_h) \right. \\ &\quad \left. + X_i \log(\hat{a}_{base,i} \times (2(1 - r_h) + c_k r_h))] \right) \end{aligned} \quad (12)$$

244 The solutions  $(\Pi^1, \tilde{r}^1)$  are substituted into equation (10) to replace  $(\Pi^0, \tilde{r}^0)$ . The  
245 expectation is then rewritten as  $E_{Y|\Pi^1, c, \tilde{r}^1, X} [l(\Pi, \tilde{r} | X, Y)]$ . The algorithm continues

246 iteratively to maximize the expectation of the log likelihood.

247

## 248 **Determining the order of copy number variants**

249 Based on the subclone size inferred using two-way cluster modeling, we can  
250 determine the order of any pairs of recurrent mutations existing in multiple samples.  
251 Herein, we use the notation MCP  $\hat{r}_{ij}$  to indicate the estimated MCP of mutation  $i$  from  
252 the model of sample  $j$ . If a pair of mutations is recurrent in tumors with a fixed order,  
253 the relative size of their estimated MCPs should be consistent. For any two loci  $a$  and  
254  $b$  with somatic mutations, the MCP profiles across  $p$  samples are  $(\hat{r}_{a1}, \dots, \hat{r}_{ap})$  and  
255  $(\hat{r}_{b1}, \dots, \hat{r}_{bp})$ . To determine whether the two mutations are highly related, the Wilcoxon  
256 signed-rank test can be applied to the profiles of the two mutations. In the event of  
257 significant inequality, when one mutation is more common in cells than the other  
258 mutation, it indicates a recurrent evolutionary order between the two mutations.

259

## 260 **Results**

261 In this study, we first evaluated the prediction accuracy of CloneDeMix by  
262 simulated data. Simulation study is useful to verify how well an algorithm behaves with  
263 data generated from the theory, but it cannot inform us how well the theory fits reality.  
264 To that end, we collected normal RNA sequences from TCGA and applied down-  
265 sampling to these normal data to create artificial copy number changes. We used the  
266 data to compare CloneDeMix with THetA by evaluating weighted root mean square  
267 error of MCP estimation and positive rate of copy number prediction. We also applied

268 CloneDeMix on head and neck cancer data from TCGA and serial biopsies of  
269 esophageal cancer [19] to infer genomic evolution based on copy number change.

## 270 **Simulation**

271 The simulation considered four variant states of copy numbers, namely 0, 1, 3, and  
272 4 copies. Four MCPs were included: 0.1, 0.3, 0.5, 0.7, and 0.9. Each combination was  
273 repeated three times, thus resulting in 60 regions with copy number changes.  
274 Furthermore, each region was assigned 20 bases generated with a Poisson distribution  
275 whose mean value was determined by its assigned copy number state and MCP. In  
276 addition to the mutated regions, 100 normal regions were scattered among the mutated  
277 regions; their copy number state was two. The simulation generated depths for a long  
278 sequence with 3,200 bases for each of the 60 samples. CloneDeMix was subsequently  
279 applied to the simulation data to reconstruct respective copy number states and MCP  
280 groups. The entire simulation process was repeated 10,000 times to obtain a conclusion.

281 The simulation was performed to evaluate the model estimation accuracy. Table 1  
282 shows the mean and standard deviation (SD) of simulation results for MCP estimation,  
283 and Fig 4 demonstrates the accuracy of assignments for copy number states. As  
284 presented in Table 1, the MCP estimates were very close to the underlying truth,  
285 indicating high performance for MCP estimation. Notably, the bias decreased as the  
286 ground value of the MCP increased. Detecting mutations of low cellular prevalence was  
287 relatively difficult because the signal was not adequately strong.

288 As illustrated in Fig 4, the accuracy of the copy number assignment under each  
289 condition was calculated from 10,000 simulations. The specificity of CloneDeMix was

290 found to be 99.58%, and the sensitivity for amplification and deletion were 93.65% and  
291 93.89%, respectively. Thus, CloneDeMix represents a high specificity and efficiently  
292 controls false positive results. As mentioned in the discussion on MCP estimation,  
293 estimating mutations of low cellular prevalence was biased. These biased MCPs  
294 directly caused the misclassification of the copy number state and reduced the model  
295 sensitivity. In conclusion, these simulations support that CloneDeMix can successfully  
296 identify the potential copy number mutations and deconvolute its amplification or  
297 deletion state from the clonal architecture.

298

299 **Table 1. Mean and SD of MCP estimation**

| True value | Summary statistics |        |
|------------|--------------------|--------|
|            | Mean               | SD     |
| 0.1        | 0.100              | 0.0067 |
| 0.3        | 0.300              | 0.0036 |
| 0.5        | 0.499              | 0.0022 |
| 0.7        | 0.699              | 0.0014 |
| 0.9        | 0.900              | 0.0008 |

300

#### **Fig 4. Result of copy number estimation**

The size of the circle is proportional to the number of loci assigned to each estimated status from 10,000 simulations. The CNA status is divided into three conditions: deletion, amplification, and normal conditions.

301

302

## **303 Comparison with THetA2**



304 In this section, we evaluated CloneDeMix on a more realistic simulation scenario  
305 and compared it with THetA2. The core concept of this simulation scenario is the use  
306 of down-sampling technique to resample reads of real normal sequencing data with  
307 artificial copy number changes.

308 To that end, we first collected 75 normal samples from TCGA and then performed  
309 standard quintile normalization to reduce noise. For simplicity, we only used  
310 chromosome 1 for validation, and chromosome 1 was first cut into 200 different regions.  
311 According to the raw data, we have the raw read counts of each region per sample. The  
312 75 samples were equally divided into case and control. In the control group, the  
313 resampled read count of each region was generated from a binomial distribution. For  
314 the parameter setting of a binomial distribution, the number of trials is set as two times  
315 raw read count and the success probability is 0.5. This procedure is called down-  
316 sampling and it guarantees the mean of resampled count is the same as the mean of raw  
317 count. In the case group, we need to randomly assign 20 regions to have copy number  
318 change. The resampled read count of CNA region also followed the binomial  
319 distribution with the number of trials equal to two times of the raw read count, but the  
320 success probability is set as  $0.5 \times (2 \times (1 - MCP) + C \times MCP) / 2$  which is determined by a  
321 predefined copy number C and MCP. The predefined copy number of a variant was set  
322 to be 0, 1, 3, and 4. The MCP was set to be 15 different values ranging from 0.1 to 0.9  
323 as shown in Fig 5.

324 Most studies integrate CNAs and single nucleotide change to improve the accuracy  
325 of copy number identification and to reduce the bias of cellular prevalence estimation.  
326 However, those approaches only study the regions that contain single nucleotide change,

327 and this constraint apparently limits our understanding of the chromosome structure  
328 change. It has been reported that CNAs affect a larger fraction of the genome in cancers  
329 than any other type of somatic genetic mutation does [23]. For example, a large-scale  
330 study of somatic CNAs across different cancers shows that in a typical cancer sample,  
331 17% of the genome was amplified and 16% genome was deleted on average [24]. Hence,  
332 for a fair comparison, we only compared CloneDeMix with THetA2 because THetA2  
333 is also a subclonal copy number decomposition method and supports direct tumor  
334 heterogeneity inference without considering SNVs.

335 Both of CloneDeMix and THetA2 are developed for multiple clone identification,  
336 but THetA2 tends to identify single clone in our experience. Therefore, we designed  
337 the resampled data as a mixture of normal cells and one subclone of tumor cells. In this  
338 simple case, the MCP is equal to the tumor purity and we explored the model  
339 performance in different purity. In Fig 5A, we measured the performance of purity  
340 estimation by weighted root mean square error (WRMSE) which is a type of adjusted  
341 RMSE. WRMSE adopts the inverse of true purity as the weight for adjustment because  
342 the variance of purity estimation is a function of the true purity. The variation of purity  
343 estimate increases when the purity increases. Across the 15 different purity settings,  
344 CloneDeMix outperforms THetA2 on measuring purity as demonstrated in Fig 5A. It  
345 is notable that the WRMSEs of THetA2 are missing zero in Fig 5 at low purity settings  
346 (0.1, and 0.16) because THetA2 cannot identify tumor population at low tumor purity.  
347 We calculated the true positive rate (TPR) and false positive rate (FPR) of copy number  
348 assignment at different purity levels in Fig 5B and Fig 5C. We found that both of them  
349 performed well when tumor purity was larger than 0.5. CloneDeMix outperformed

350 THetA2 in the low purity. It indicates CloneDeMix and THetA2 are equally well at  
351 exploring large subclones while CloneDeMix has better detection power for small  
352 subclones.

353

### **Fig 5. Comparison of CloneDeMix and THetA2 with resampled data**

(A) The Y-axis is the weighted root mean square error (WRMSE) for measuring the performance of MCP (or purity) estimate, and X-axis represents the true purity setting. (B) The true positive rate (TPR) of copy number detection. (C) The false positive rate of copy number detection.

354

355

## **356 Preprocessing of TCGA data**

357 We analyzed the whole-exon sequencing data of 75 head and neck tumor samples  
358 with their paired normal samples from TCGA (<http://cancergenome.nih.gov/>). This  
359 dataset includes a total of 20,846 genes with 180,243 exons. We assumed the copy  
360 number state of a single exon to be homogeneous. Each exon was represented by the  
361 mean read depth. The read-depth profile of a tumor sample was normalized with loess  
362 transformation against its paired normal sample. The baseline parameter  $a_{base,i}$  for  
363 exon  $i$  was estimated from the paired normal sample by using half of the read depth of  
364 the normal sample at the same locus. Because the normal sample could also have an  
365 abnormal copy number status, we checked it against all other normal samples. The  
366 target normal sample was first normalized against all other normal samples by using  
367 the cyclic loess method and was subsequently processed through CloneDeMix to  
368 identify the copy number status at each locus. In this step, the average profile of all

369 other normal samples was treated as the baseline. If, for example, an abnormal copy  
370 number is found to be  $k$ , the raw read depth of this locus would be divided by  $k$  to  
371 provide the estimate of  $a_{base,i}$  for tumor modeling.

## 372 **Copy number distribution and clone structure**

373 We applied CloneDeMix to each normalized sample and estimated the copy  
374 number state of each locus as well as the corresponding MCPs. Fig 6A shows the  
375 chromosomes that were mutated most frequently, and the results of all other  
376 chromosomes are shown in S1 Fig. This figure presents the copy number events across  
377 180,243 exons for each of the 75 tumor–control sample pair. The proportion of exons  
378 with a normal copy number was high in all samples, and it was close to 100% in the  
379 control samples. The proportion was significantly decreased in the tumor samples,  
380 indicating considerable structural variations during cancer development.

381

### **Fig 6. Copy number estimation of chromosomes with high mutation rates**

(A) The estimated copy number states for exons across the genome are presented by different colors. Light blue and red represent the deletion and amplification events, respectively. Black indicates no copy number changes. (B) The black dots indicate the estimated MCPs with respect to the left axis. The red bars represent the number of MCPs with respect to the right axis.

382

383

384 On average, 4.7% and 8.7% of exons were estimated to have deletion and  
385 amplification, respectively. We also found that the exons located at 3p, 21p, and 18q  
386 were deleted most frequently, and the average proportions of deletion within these

387 chromosomal arms were 19%, 17%, and 13%, respectively. Conversely, the estimated  
388 amplification frequently occurred at 3q, 8q, and 5p, with average frequency levels of  
389 29%, 24%, and 23%, respectively. Previous studies have reported a loss of 3p and 8p  
390 as well as gains of 3q, 5p, and 8q not only in head and neck cancer but also in most  
391 tumors [20-23]; these results are concordant with our findings. Other novel subclonal  
392 CNA regions that were not reported in pan-cancer data analysis [20-23] were identified  
393 as multiple tumor subpopulations were considered (e.g. Deletion in 21p, S1 Fig). These  
394 subclonal CNA signals may be diluted in the previous studies that assumed only one  
395 homogeneous tumor clone and inferred CNAs from the average of whole tumor  
396 information. Our results confirm the identification strength of large-scale structural  
397 variations based on clonal evolution.

398 Fig 6B presents a summary of MCP estimation. The number of MCPs was  
399 determined using the model selection criterion AIC. We associated the number of  
400 subclones in the tumors with clinical outcomes because this number is closely related  
401 to tumor heterogeneity. The target phenotype included tumor invasion and metastasis,  
402 which are particularly ominous signs of poor prognosis in head and neck cancer. The  
403 association analysis was applied to only 68 samples because the clinical records of the  
404 other samples were incomplete in TCGA. Fig 7A illustrates the box plot of the number  
405 of MCP groups under each clinical group. In this figure, a sample is denoted as “NO”  
406 if no record of either invasion or metastasis exists; otherwise, it is denoted as “YES.”  
407 There appeared to be a tendency of increased tumor heterogeneity for tumors with  
408 invasion or metastasis. The variation of numbers of MCPs was larger for this group. To  
409 more comprehensively clarify this factor, we dichotomized the number of MCPs into

410 two groups. The number of MCPs exceeding 4 indicated strong tumor heterogeneity,  
411 whereas a lower number indicated less heterogeneity. The contingency table (Fig 7B)  
412 shows the dichotomization of tumor heterogeneity associated with the clinical  
413 outcomes. The corresponding odds ratio was 3.64, and the p value evaluated with  
414 logistic regression was 0.029. For the samples with higher tumor heterogeneity, the  
415 odds of invasion and metastasis were 3.64 times higher than those for the samples with  
416 lower tumor heterogeneity. In recent studies of head and neck cancer, this association  
417 between tumor heterogeneity and metastasis was explored by whole exome sequencing  
418 and single cell RNA sequencing [25-27]. These studies also found the difference in  
419 tumor heterogeneity between primary and matched lymph node metastases samples.

420 We further investigated the association of overall patient survival and tumor  
421 heterogeneity by survival analysis, and used two different ways to demonstrate this  
422 association. First, we directly considered the subclone number as a covariate of survival  
423 analysis, and then applied Cox model to analyze the effect of subclones. We got a p-  
424 value, 0.036, by Wald's test, and apparently tumor heterogeneity is a risk factor for  
425 survival. Next, we considered three different tumor heterogeneity levels of samples and  
426 performed Kaplan-Meier (KM) curve for different levels. To this end, all of the samples  
427 are divided into three classes by its subclones number, low-heterogeneity (less than 5  
428 subclones), median-heterogeneity ( $5 \leq$  subclone number  $\leq 8$ ), and high-heterogeneity  
429 (large than 8 subclones). The sample sizes of the three classes are 20, 36, and 19,  
430 respectively. Fig 8 showed the survival curves of the three classes with different colors,  
431 and the survival curve of high-heterogeneity samples is worse than the others. Hence,  
432 high-heterogeneity is associated with poor overall survival. It indicates the tumor

433 behavior varies with its heterogeneity. The heterogeneity and mortality in head and neck  
434 cancer was also investigated by a different approach [26], and it also concluded that  
435 high-heterogeneity in tumors had doubled the hazard of death.

436

**Fig 7. Comparison for the number of MCPs in different clinical groups**

(A) The box plot for the number of MCPs with and without invasion or metastasis. The number of MCPs in each sample is represented by a black point jittered around the box. (B) Contingency table for dichotomization of tumor heterogeneity and clinical outcomes.

437

**Fig 8. Survival curves between different classes of heterogeneity levels**

There are three Kaplan-Meier (KM) curves. The blue, yellow, and green represent the group of low, median, and high heterogeneity, respectively.

438

439

440 **Inference of evolutionary order of mutations**

441 As stated in the Methods section, we inferred the evolutionary order of recurrent  
442 variants with multiple samples. For easy comprehension, we demonstrated the result at  
443 the gene level through a series of summary steps. We first selected the genes with  
444 consistent amplification or deletion states in more than 25% of the exons within at least  
445 one sample. A total of 3,244 genes were included in this demonstration, and this set is  
446 called the background gene set. For each sample, the MCP of a gene was represented  
447 by the mean MCP of its exons. We then performed the Wilcoxon signed-rank test using  
448 the gene-level MCP of any two genes across the samples to derive all pairwise  
449 evolutionary relationships. For example, if the MCP of gene  $i$  was larger than that of

450 gene  $j$  ( $p = 0.05$ ), the mutation on gene  $i$  was more likely to be an earlier event than that  
451 on gene  $j$ . This relationship was marked as 1; otherwise, it was marked as 0. The 0–1  
452 matrices of pairwise evolutionary relationships were separately calculated for samples  
453 with and without nodal metastasis, and they could be denoted as a matrix  $M_{neg}$  and  
454  $M_{pos}$ . The element of the matrix could be denoted as  $M_{E,ij}$ , representing the  
455 evolutionary order of mutations on gene  $i$  against mutations on gene  $j$  inferred with  
456 samples under the E condition, which could be *neg* or *pos*.

457 The evolutionary order matrix can be used to construct an evolutionary tree of all  
458 mutations. However, a tree of 3,244 genes is highly complicated, rendering the  
459 comparison of different clinical traits difficult. Therefore, for simplification, we  
460 proposed a progression score to summarize the relative position of a mutation on the  
461 evolutionary tree of tumor formation. The scores of a gene in advanced tumors can be  
462 compared with those of genes in newly developed tumors to select the ones that  
463 recurrently occur in the early stage of tumor development. The P score of gene  $i$  under  
464 condition E is thus defined as a summary statistic from the evolution matrix and is  
465 formulated as follows:

$$\text{P score (gene } i | E) = \sum_{j \neq i} M_{E,ij} / (\sum_{j \neq i} M_{E,ij} + \sum_{k \neq i} M_{E,ki}). \quad (13)$$

466 Among all relations of gene  $i$  with other genes, the P score provides the number of times  
467 the mutation in gene  $i$  is more likely to occur before that in other genes. If a gene is  
468 close to the root of an evolutionary tree, its corresponding P score must be higher than  
469 that of its descending gene.

470 We first investigated the P-score behavior of prevalent genes which have been  
471 discussed in head and neck cancer [22], and the results are listed in Table 2. The P-score



472 of PIK3CA is consistently larger than 0.9 across different clinical traits. That is, the  
473 mutation of PIK3CA occurs early in the tumor progression. In contrast, patients with  
474 perineural invasion acquire early mutation of CDKN2A gene more often. Some of the  
475 well-known cancer genes are not powerful in our P-score analysis. For example, we  
476 identified structure variation of TP53 only in a few patients, and these few MCPs are  
477 not enough to construct a powerful P-score.

478 We compared the P score between the samples with and without nodal metastasis  
479 by plotting a scatter plot (Fig 9). Most background genes tend to mutate in a random  
480 order not related to tumor progression. According to our P score definition, we  
481 postulated that the driving genes of lymph node metastasis would be scattered above  
482 the diagonal line. The genes above the diagonal line of the plot are more likely to  
483 acquire mutations at an earlier stage of tumor formation and occupy a significant  
484 proportion of the tumor at its advanced stage. This would yield higher P scores when  
485 only the samples with lymph node metastasis are considered. By contrast, the  
486 prevalence of mutations in those genes might be low in the samples without lymph node  
487 metastasis and hence yield lower P scores.

488

489 **Table 2. The P-score of CDKN2A, E2F1, and PIK3CA in different clinical outcomes**

|               | All      | Margin status |          | Vital status |       | ECS      |          | Invasion |       |
|---------------|----------|---------------|----------|--------------|-------|----------|----------|----------|-------|
|               | patients | Positive      | Negative | Dead         | Alive | Positive | Negative | Yes      | No    |
| <i>CDKN2A</i> | 0.665    | 0.676         | 0.703    | 0.747        | 0.511 | 0.593    | 0.625    | 0.875    | 0.292 |
| <i>E2F1</i>   | 0.726    | 0.092         | 0.840    | 0.697        | 0.889 | 0.618    | 0.899    | 0.078    | 0.997 |
| <i>FAT1</i>   | 0.776    | 0.937         | 0.714    | 0.714        | 0.931 | 0.683    | 0.657    | 0.687    | 0.866 |
| <i>HAS2</i>   | 0.081    | 0.041         | 0.078    | 0.016        | 0.371 | 0.757    | 0.064    | 0.351    | 0.006 |
| <i>TGFBR2</i> | 0.591    | 0.443         | 0.629    | 0.697        | 0.412 | 0.646    | 0.643    | 0.684    | 0.394 |
| <i>PIK3CA</i> | 0.964    | 0.998         | 0.955    | 0.978        | 0.947 | 0.990    | 0.906    | 0.991    | 0.924 |

490

491

**Fig 9. Scatter plot of P scores between nodal positive and nodal negative samples**

The red points indicate the background gene set. The red curve indicates the loess smoothing curve constructed using all points in the figure. Genes related to cell migration are marked in black. The genes from 11q13.3 are marked in blue. The literature supporting genes are labeled.

492

493 To confirm our conjecture, we selected the genes by their biological functions using  
494 ConsensusPathDB web (<http://cpdb.molgen.mpg.de/>) and investigated whether genes  
495 related to metastasis in the literature are more likely to be distributed above the diagonal  
496 line. Because cell migration is a crucial step in the metastatic cascade, we selected cell-  
497 migration-related genes, which are marked as black in Fig 9. Consequently, we found  
498 that 43 genes had the function of cell migration. Most of these genes were distributed  
499 above the diagonal line of the P score scatter plot, whereas some were distributed below  
500 the diagonal line. Recurrent mutations in these cell migration genes are expected to be  
501 the driving forces for the initiation of lymph node metastasis, consistent with our  
502 observations. For example, HAS2 is a member of the gene family encoding putative  
503 hyaluronan synthases, which control the biosynthesis of hyaluronan and critically  
504 modulate the tumor microenvironment. Several studies have shown that the inhibition  
505 of HAS2 reduced the invasion of oral squamous cell carcinoma [28-30]. Similar to  
506 HAS2, ANGPT1 is located in the upper left corner and has been recently investigated  
507 for the mechanism of lymph node metastasis [31-34]. ANGPT1 plays an important role  
508 in the regulation of vascular development and maintenance of vessel integrity. A study  
509 showed that the activity of ANGPT1 induced the enlargement of tumor blood vessels  
510 to facilitate tumor cell dissemination and increased the ability of metastasis in tumors

511 [34]. Fibroblast growth factor (FGF)-4 is another notable example. The P score of FGF4  
512 significantly differs in nodal positive and negative patients. FGF4 is a member of the  
513 FGF family and possesses broad mitogenic and cell survival activities. It has been  
514 proposed to be involved in tumor growth, cell proliferation, and lymph node metastasis  
515 [35-37]. In contrast to the black genes located in the upper left corner of the plot in Fig  
516 9, few studies have reported any relationship between the black genes located in the  
517 lower right corner and lymph node metastasis, although they have the same biological  
518 function. A complete literature review of the genes associated with cell migration and  
519 tumor metastasis is presented in S1 Table. The observations suggest that our inference  
520 of the clonal evolutionary order is relevant and can be applied for identifying causal  
521 drivers.

522 Another notable observation is about the neighboring genes of FGF4. As  
523 mentioned, FGF4 is an important gene for driving lymph node metastasis. It is located  
524 in 11q13.3, which is frequently amplified in head and neck squamous cell carcinoma  
525 [35]. Sugahara also listed several other genes in 11q13.3 that are related to cancer  
526 development, namely *TPCN2*, *MYEOV*, *CCND1*, *ORAOV1*, *TMEM16A*, *FADD*,  
527 *PPFIA1*, *CTTN*, *SHANK2*, and *DHCR7*. We also assessed their status by using the P  
528 score analysis; the genes are indicated in blue in Fig 9. All these genes were above the  
529 diagonal line. Their corresponding P scores showed considerably significant differences  
530 between patients with and without nodal metastasis. Hence, we postulated that those  
531 genes in 11q13.3 are possibly related to lymph node metastasis in head and neck cancer.  
532 Several previous studies have confirmed this observation, as reported in S2 Table.

533

## 534 **Application on serial biopsies of esophageal cancer**

535 We next applied CloneDeMix on multiregional whole-exome sequencing data from  
536 13 primary esophageal squamous cell carcinoma (ESCC) patients [19]. There are 51  
537 tumor regions and 13 matched morphologically normal esophageal tissues sequenced  
538 with the mean coverage of 150x. For fair comparison, we selected 11 of 13 patients  
539 based on its platform. We also removed patient ESCC07 because we only got two  
540 regions successfully aligned to the reference genome. In total, we included 10 patients  
541 in this application, and, for each patient, we have four different tumor regions with one  
542 matched esophageal tissue. As preprocess of TCGA data, the read-depth profiles of  
543 ESCC tumors are normalized with loess transformation against its paired normal  
544 sample. For each individual, the paired normal tissue is also used to calculate the  
545 estimates of baseline, and then applied CloneDeMix to tumors for gene-specific CNVs  
546 and MCPs.

547 In this application, we aim to explore the variability of evolutionary structure  
548 among multiregional tumors by inferring the order of copy number change. For the  
549 purpose of studying variability between regions, we only focused on the frequently  
550 mutated genes which are informative about tumor evolution. Although the construction  
551 through these genes is not able to resolve completely the entire evolutionary structure,  
552 the inferred structure between regions can still facilitate the understanding of tumor  
553 progression. To that end, we collected the target gene list from the Ion AmpliSeq  
554 Comprehensive Cancer Panel which includes 7,044 exons of 409 tumor suppressor  
555 genes and oncogenes. The estimated CNVs and MCPs of the ESCC biopsies for this

556 gene set were summarized and interpreted as follows.

557 We first investigated genomic heterogeneity of ECSS through MCP comparison.  
558 MCP is a gene-specific measurement of fraction of cells that carry a certain mutation,  
559 and we can study the overall structure of MCPs across whole genome to reveal the  
560 genomic heterogeneity of a given sample. We calculated the correlation matrix of MCP  
561 between samples, and this correlation matrix is presented in Fig 10. The diagonal blocks  
562 of this correlation matrix are tissues of the same sample and are slightly higher than the  
563 others. The average correlation of diagonal block is 0.5 and the average of off-diagonal  
564 cells 0.3. It shows that the MCP structure within each patient is more consistent than  
565 between patients.

566 Next, we identified the evolution-related genes for each individual. In ESCC study,  
567 each tumor was dissected into four regions, and this kind of serial biopsies has a natural  
568 assumption that the size of MCPs is comparable within a given tumor. This  
569 characteristic can facilitate the individual-specific heterogeneity study. In order to  
570 explore individual-specific heterogeneity, we first identified genes on the trunk and on  
571 the branch of the evolutionary tree separately. The trunk of the tree refers to the CNAs  
572 consisted in all regions while the branch refers to those only in some regions. We can  
573 identify these genes according to the MCP across regions. A gene is located on the trunk  
574 of a tree if its average MCP across four regions is larger than 0.8, and a gene is located  
575 on the branch of a tree if the MCP of one region is larger than the average MCP of all  
576 the remaining regions by 0.7. Instead of tree comparison, we directly compare the MCP  
577 matrix of selected genes (Fig 11). In Fig 11, genes in red rectangles are selected to be  
578 the trunk genes, and the remaining genes are on the branch of a tree.

579 The two types of genes defined above reveals huge variability of evolution  
580 structure across tumors. The genes on the trunk of a given tree represent the genes  
581 changed in copy number at an earlier stage of tumor formation, and these genes have  
582 potential ability to drive tumor growth. For example, most of the genes on the trunk of  
583 sample ESCC12 (CCND1, EGFR, APC, TGFBR2, XPC, XPA, FLI1, and NUMA1)  
584 have been identified and initially reported on the esophageal cancer [38-42]. Although  
585 the genes on the trunks of trees vary among different individuals, there are still genes  
586 repeatedly identified in multiple individuals such as CCND1, JAK2, UGT1A1, FLI1,  
587 NFE2L2, SOX2, CDKN2B, and MYC. Specifically, CCND1 was identified in six  
588 individuals as the trunk gene and is a well-known cancer oncogene located on 11q13.  
589 Its amplification has been reported in several human neoplasias [43].

590

591

**Fig 10. Correlation matrix of MCP between samples**

Each cell indicates the correlation of MCPs between the corresponding ESCC samples.

592

**Fig 11. MCP matrices of selected genes among 10 samples**

There are six MCP matrices. The color of each cell represents the MCP quantity of a gene for a given sample. The labels of rows indicate the gene symbols, and the labels of columns are region index A gene within the red rectangle is identified as the gene located on the trunk of an evolutionary tree.

593

594

595 **Discussion**

596 In this study, we developed CloneDeMix for the deconvolution of tumor  
597 progression through high-throughput DNA sequencing data. The features of  
598 CloneDeMix are as follows. First, it reconstructs an evolutionary structure of copy  
599 number changes during tumorigenesis. Most existing methods for cancer evolution  
600 discuss the history of single-nucleotide changes and derive the potential driver genes.  
601 However, the importance of CNAs is growing and its influence on disease and cancer  
602 development is clearly established [44]. Therefore, the reconstruction of copy number  
603 evolution in tumor progression is in demand. Second, CloneDeMix provides the MCP  
604 as a measure of the evolutionary structure. This measurement is used to estimate the  
605 fraction of cells containing a specific set of mutational events. According to the  
606 definition of the MCP, it provides a more direct evolutionary reconstruction than does  
607 the SCP, which is defined as the size of a subclone in a tumor. For instance, the MCPs  
608 of early mutations in cancer must exceed those of other mutations, but no such structural  
609 relationship exists for SCPs. Although MCPs of a tumor is related to its phylogenetic  
610 tree, we do not have DNA haplotypes to resolve the tree architecture from many  
611 possibilities for each individual tumor. Hence, in this study, we only borrow the strength  
612 of multiple samples to understand potential evolutionary orders using the P score. Third,  
613 our model exhibits high flexibility. CloneDeMix can identify the copy number state of  
614 any type of variant, from a single nucleotide to a moderate size of regions. Furthermore,  
615 the model facilitates the simultaneous analysis of multiple types of targets because it  
616 depends on only the summary information of each locus.

617 The simulation study revealed that CloneDeMix can identify the current clonal  
618 structures of a tumor. The accuracy of copy number states was nearly 93%, and the

619 MCP was also accurately restored (Table 1). Furthermore, the application of  
620 CloneDeMix to head and neck cancer data from TCGA yielded promising putative  
621 CNAs. The deletions observed on chromosomes 3p, 18q, and 21p and the  
622 amplifications on chromosomes 3q, 5p, and 8q are consistent with most cancer studies  
623 on copy number identification [20-23]. This observation strongly supports our CNA  
624 inference procedure.

625       When the estimation accuracy reaches a certain level, the most important concern  
626 is to understand the relationship between tumor heterogeneity and disease progression.  
627 Tumor clone dynamics have been associated with clinical outcomes for different types  
628 of cancer [45-47]. Our method provides a quantitative measurement of clonality, and it  
629 is associated with tumor invasion and metastasis development in TCGA database.  
630 Tumors with more subclones are a result of complex branched evolution, implying a  
631 series of adaptations to a new environment. These newly emerged subclones may  
632 contribute to metastatic initiation or acquire a new ability to invade the lymphatic or  
633 vascular system. Thus, the strong prognostic association of the number of MCPs with  
634 invasion or metastasis reinforces its clinical relevance; this index appears to be a novel  
635 feature for further exploration.

636       We established a novel score, the P score, for evaluating the order of a recurrent  
637 mutation in the evolutionary hierarchy by analyzing multiple samples. By comparing  
638 the P scores of a somatic variant between different clinical groups, we could identify  
639 the copy number mutations that occur early in the tumor stage and expand the  
640 accompanied subclones with time. The utility of P scores was also demonstrated in the  
641 head and neck cancer data according to the sample status of metastasis. Furthermore,



642 we identified a group of genes that matched this condition. Specifically, the genes  
643 located at 11q13.3 are well known to be frequently amplified in head and neck  
644 squamous cell carcinomas. Their P scores in our analysis were particularly high for the  
645 samples with lymph node metastasis and relatively low for those without metastasis.  
646 Accordingly, those gene amplifications are potential causal mutations to drive  
647 metastatic cascade in head and neck cancer. Hence, screening for genes that differ  
648 considerably in their P scores is meaningful for driver gene detection.

649 The success of our approach highly depends on the coverage of DNA sequencing.  
650 A higher read depth can more efficiently reflect the clonal structure and copy number  
651 changes of different loci. Currently, CloneDeMix makes an independent assumption  
652 without considering the dependency among closely located loci. Hence, the  
653 neighboring segments are not grouped into the same copy number events. This can be  
654 an advantage as well as a disadvantage because there is no clear understanding about  
655 the range covered by a copy number event. Technically, we can still integrate the  
656 correlation structure into CloneDeMix to improve the flexibility; this is an ongoing  
657 project for our next version of the R package.

658 CloneDeMix can easily integrate different types of somatic mutations detected in  
659 sequencing data. For example, the well-studied SNVs carry extensive information  
660 about the clonal expansion in tumors. CloneDeMix can consider the copy number status  
661 of two alleles individually if the detection of each allele is optimized. Therefore, we  
662 expect CloneDeMix to be useful in understanding tumor heterogeneity and how it  
663 evolves to the current status. Moreover, CloneDeMix has high specificity for detecting  
664 early mutations in tumor progression; these early mutations would be good candidates

665 for disease driver genes and targeted therapies.

666

667

## 668 **Acknowledgments**

669 This work was supported by the Ministry of Science and Technology [MOST 105-2118-  
670 M-007-001].

671

## 672 **Reference**

673 1. Nowell PC. The clonal evolution of tumor cell populations. *Science*.  
674 1976;194(4260):23-8.

675 2. Kreso A, O'Brien CA, van Galen P, Gan OI, Notta F, Brown AM, et al. Variable clonal  
676 repopulation dynamics influence chemotherapy response in colorectal cancer. *Science*.  
677 2013;339(6119):543-8.

678 3. Hou Y, Song L, Zhu P, Zhang B, Tao Y, Xu X, et al. Single-cell exome sequencing and  
679 monoclonal evolution of a JAK2-negative myeloproliferative neoplasm. *Cell*.  
680 2012;148(5):873-85.

681 4. Xu X, Hou Y, Yin X, Bao L, Tang A, Song L, et al. Single-cell exome sequencing  
682 reveals single-nucleotide mutation characteristics of a kidney tumor. *Cell*.  
683 2012;148(5):886-95.

684 5. Wang Y, Waters J, Leung ML, Unruh A, Roh W, Shi X, et al. Clonal evolution in  
685 breast cancer revealed by single nucleus genome sequencing. *Nature*.  
686 2014;512(7513):155-60.

687 6. Ding L, Raphael BJ, Chen F, Wendl MC. Advances for studying clonal evolution in  
688 cancer. *Cancer letters*. 2013;340(2):212-9.

689 7. Oesper L, Mahmoody A, Raphael BJ. THetA: inferring intra-tumor heterogeneity  
690 from high-throughput DNA sequencing data. *Genome Biol*. 2013;14(7):R80.

- 691 8. Malikic S, McPherson AW, Donmez N, Sahinalp CS. Clonality inference in multiple  
692 tumor samples using phylogeny. *Bioinformatics*. 2015;31(9):1349-56.
- 693 9. El-Kebir M, Oesper L, Acheson-Field H, Raphael BJ. Reconstruction of clonal trees  
694 and tumor composition from multi-sample sequencing data. *Bioinformatics*.  
695 2015;31(12):i62-i70.
- 696 10. Deshwar AG, Vembu S, Yung CK, Jang GH, Stein L, Morris Q. PhyloWGS:  
697 Reconstructing subclonal composition and evolution from whole-genome sequencing  
698 of tumors. *Genome biology*. 2015;16(1):35.
- 699 11. Jiao W, Vembu S, Deshwar AG, Stein L, Morris Q. Inferring clonal evolution of  
700 tumors from single nucleotide somatic mutations. *BMC bioinformatics*. 2014;15(1):35.
- 701 12. Miller CA, White BS, Dees ND, Griffith M, Welch JS, Griffith OL, et al. SciClone:  
702 inferring clonal architecture and tracking the spatial and temporal patterns of tumor  
703 evolution. 2014.
- 704 13. Roth A, Khattra J, Yap D, Wan A, Laks E, Biele J, et al. PyClone: statistical inference  
705 of clonal population structure in cancer. *Nature methods*. 2014;11(4):396-8.
- 706 14. Oesper L, Satas G, Raphael BJ. Quantifying tumor heterogeneity in whole-genome  
707 and whole-exome sequencing data. *Bioinformatics*. 2014;30(24):3532-40.
- 708 15. Li Y, Xie X. Deconvolving tumor purity and ploidy by integrating copy number  
709 alterations and loss of heterozygosity. *Bioinformatics*. 2014:btu174.
- 710 16. Li Y, Xie X. MixClone: a mixture model for inferring tumor subclonal populations.  
711 *BMC genomics*. 2015;16(Suppl 2):S1.
- 712 17. Yu Z, Li A, Wang M. CloneCNA: detecting subclonal somatic copy number  
713 alterations in heterogeneous tumor samples from whole-exome sequencing data.  
714 *BMC bioinformatics*. 2016;17(1):310.
- 715 18. Fischer A, Vázquez-García I, Illingworth CJ, Mustonen V. High-definition  
716 reconstruction of clonal composition in cancer. *Cell reports*. 2014;7(5):1740-52.
- 717 19. Hao J-J, Lin D-C, Dinh HQ, Mayakonda A, Jiang Y-Y, Chang C, et al. Spatial  
718 intratumoral heterogeneity and temporal clonal evolution in esophageal squamous  
719 cell carcinoma. *Nature genetics*. 2016;48(12):1500.
- 720 20. Koboldt DC, Zhang Q, Larson DE, Shen D, McLellan MD, Lin L, et al. VarScan 2:  
721 somatic mutation and copy number alteration discovery in cancer by exome  
722 sequencing. *Genome research*. 2012;22(3):568-76.
- 723 21. Krijgsman O, Carvalho B, Meijer GA, Steenbergen RD, Ylstra B. Focal chromosomal  
724 copy number aberrations in cancer—Needles in a genome haystack. *Biochimica et*  
725 *Biophysica Acta (BBA)-Molecular Cell Research*. 2014;1843(11):2698-704.

- 726 22. Network CGA. Comprehensive genomic characterization of head and neck  
727 squamous cell carcinomas. *Nature*. 2015;517(7536):576-82.
- 728 23. Zack TI, Schumacher SE, Carter SL, Cherniack AD, Saksena G, Tabak B, et al. Pan-  
729 cancer patterns of somatic copy number alteration. *Nature genetics*.  
730 2013;45(10):1134-40.
- 731 24. Beroukhi R, Mermel CH, Porter D, Wei G, Raychaudhuri S, Donovan J, et al. The  
732 landscape of somatic copy-number alteration across human cancers. *Nature*.  
733 2010;463(7283):899.
- 734 25. Puram SV, Tirosh I, Parikh AS, Patel AP, Yizhak K, Gillespie S, et al. Single-Cell  
735 Transcriptomic Analysis of Primary and Metastatic Tumor Ecosystems in Head and  
736 Neck Cancer. *Cell*. 2017;171(7):1611-24. e24.
- 737 26. Mroz EA, Tward AM, Hammon RJ, Ren Y, Rocco JW. Intra-tumor genetic  
738 heterogeneity and mortality in head and neck cancer: analysis of data from the Cancer  
739 Genome Atlas. *PLoS medicine*. 2015;12(2):e1001786.
- 740 27. Mroz EA, Tward AD, Pickering CR, Myers JN, Ferris RL, Rocco JW. High intratumor  
741 genetic heterogeneity is related to worse outcome in patients with head and neck  
742 squamous cell carcinoma. *Cancer*. 2013;119(16):3034-42.
- 743 28. Bernert B, Porsch H, Heldin P. Hyaluronan synthase 2 (HAS2) promotes breast  
744 cancer cell invasion by suppression of tissue metalloproteinase inhibitor 1 (TIMP-1).  
745 *Journal of Biological Chemistry*. 2011;286(49):42349-59.
- 746 29. Zhang Z, Tao D, Zhang P, Liu X, Zhang Y, Cheng J, et al. Hyaluronan synthase 2  
747 expressed by cancer-associated fibroblasts promotes oral cancer invasion. *Journal of*  
748 *Experimental & Clinical Cancer Research*. 2016;35(1):181.
- 749 30. Li P, Xiang T, Li H, Li Q, Yang B, Huang J, et al. Hyaluronan synthase 2  
750 overexpression is correlated with the tumorigenesis and metastasis of human breast  
751 cancer. *International journal of clinical and experimental pathology*. 2015;8(10):12101.
- 752 31. Fagiani E, Lorentz P, Kopfstein L, Christofori G. Angiopoietin-1 and-2 exert  
753 antagonistic functions in tumor angiogenesis, yet both induce lymphangiogenesis.  
754 *Cancer research*. 2011;71(17):5717-27.
- 755 32. Holopainen T, Huang H, Chen C, Kim KE, Zhang L, Zhou F, et al. Angiopoietin-1  
756 overexpression modulates vascular endothelium to facilitate tumor cell dissemination  
757 and metastasis establishment. *Cancer research*. 2009;69(11):4656-64.
- 758 33. Mangiola S, Hong MK, Cmero M, Kurganovs N, Ryan A, Costello AJ, et al.  
759 Comparing nodal versus bony metastatic spread using tumour phylogenies. *Scientific*  
760 *Reports*. 2016;6.
- 761 34. Li T, Yang J, Zhou Q, He Y. Molecular regulation of lymphangiogenesis in

- 762 development and tumor microenvironment. *Cancer Microenvironment*.  
763 2012;5(3):249-60.
- 764 35. Sugahara K, Michikawa Y, Ishikawa K, Shoji Y, Iwakawa M, Shibahara T, et al.  
765 Combination effects of distinct cores in 11q13 amplification region on cervical lymph  
766 node metastasis of oral squamous cell carcinoma. *International journal of oncology*.  
767 2011;39(4):761.
- 768 36. Muller D, Millon R, Lidereau R, Engelmann A, Bronner G, Flesch H, et al. Frequent  
769 amplification of 11q13 DNA markers is associated with lymph node involvement in  
770 human head and neck squamous cell carcinomas. *European Journal of Cancer Part B:*  
771 *Oral Oncology*. 1994;30(2):113-20.
- 772 37. Qi L, Song W, Li L, Cao L, Yu Y, Song C, et al. FGF4 induces epithelial-mesenchymal  
773 transition by inducing store-operated calcium entry in lung adenocarcinoma.  
774 *Oncotarget*. 2016;7(45).
- 775 38. Hao J-J, Shi Z-Z, Zhao Z-X, Zhang Y, Gong T, Li C-X, et al. Characterization of genetic  
776 rearrangements in esophageal squamous carcinoma cell lines by a combination of M-  
777 FISH and array-CGH: further confirmation of some split genomic regions in primary  
778 tumors. *BMC cancer*. 2012;12(1):367.
- 779 39. Yang P-W, Hsieh C-Y, Kuo F-T, Huang P-M, Hsu H-H, Kuo S-W, et al. The survival  
780 impact of XPA and XPC genetic polymorphisms on patients with esophageal squamous  
781 cell carcinoma. *Annals of surgical oncology*. 2013;20(2):562-71.
- 782 40. Nomura T, Miyashita M, Makino H, Maruyama H, Katsuta M, Kashiwabara M, et  
783 al. Argon plasma coagulation for the treatment of superficial esophageal carcinoma.  
784 *Journal of Nippon Medical School*. 2007;74(2):163-7.
- 785 41. Petty RD, Dahle-Smith A, Stevenson DA, Osborne A, Massie D, Clark C, et al.  
786 Gefitinib and EGFR gene copy number aberrations in esophageal cancer. *Journal of*  
787 *Clinical Oncology*. 2017;35(20):2279-87.
- 788 42. Hu X, Moon JW, Li S, Xu W, Wang X, Liu Y, et al. Amplification and overexpression  
789 of CTTN and CCND1 at chromosome 11q13 in Esophagus squamous cell carcinoma  
790 (ESCC) of North Eastern Chinese Population. *International journal of medical sciences*.  
791 2016;13(11):868.
- 792 43. Santarius T, Shipley J, Brewer D, Stratton MR, Cooper CS. A census of amplified  
793 and overexpressed human cancer genes. *Nature Reviews Cancer*. 2010;10(1):59.
- 794 44. Valsesia A, Macé A, Jacquemont S, Beckmann JS, Kutalik Z. The growing  
795 importance of CNVs: new insights for detection and clinical interpretation. *Frontiers in*  
796 *genetics*. 2013;4:92.
- 797 45. McGranahan N, Furness AJ, Rosenthal R, Ramskov S, Lyngaa R, Saini SK, et al.  
798 Clonal neoantigens elicit T cell immunoreactivity and sensitivity to immune checkpoint

799 blockade. *Science*. 2016;351(6280):1463-9.

800 46. Park SY, Gönen M, Kim HJ, Michor F, Polyak K. Cellular and genetic diversity in the  
801 progression of in situ human breast carcinomas to an invasive phenotype. *The Journal*  
802 *of clinical investigation*. 2010;120(2):636-44.

803 47. Maley CC, Galipeau PC, Finley JC, Wongsurawat VJ, Li X, Sanchez CA, et al. Genetic  
804 clonal diversity predicts progression to esophageal adenocarcinoma. *Nature genetics*.  
805 2006;38(4):468-73.

806

807

808

809

810

811

812

813

814

815

816

817

818

819

## 820 **Supporting Information**

821

822 **S1 Table. Reference list of cell-migration-related genes**

823 **S2 Table. List of reference genes in 11q13.3**

824 **S1 Fig. Copy number estimation results**

825 The estimated copy number states for the exons across the genome are presented in different colors. Light  
826 blue and red represent the deletion and amplification events, respectively. Black indicates no copy  
827 number changes.

828 **S1 Software.**

829 Software S1 is an R package called “CloneDeMix” that implements subclonal copy number  
830 decomposition and it is available at <https://github.com/AshTai/CloneDeMix>.

831

# Data Preparation

## DNA sequencing

Normal tissue

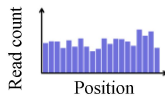

Tumors

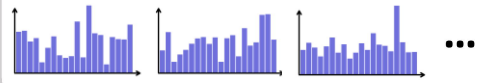

- Define regions of interest. (It can be a single base, exon or gene.)

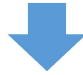

- Calculate average read count of regions.

*Input*

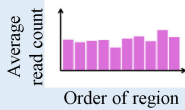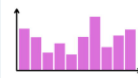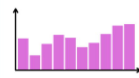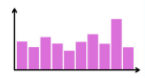

# CloneDeMix

- ✓ Number of subclones

- Output*
- ✓ Target-specific copy number

- ✓ MCP

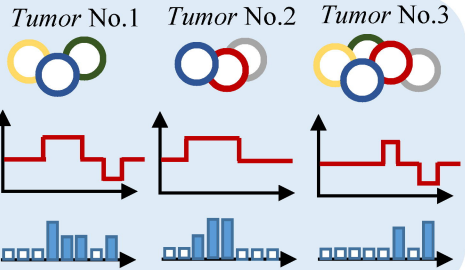

# Inference of Heterogeneity

- Use MCPs to infer tumor evolution by comparing P-score.

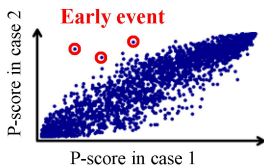

Compare P-score

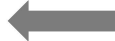

*MCP matrix of an individual*

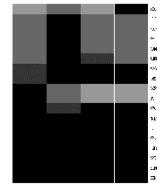



**A**

25%

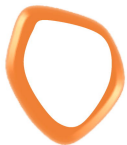

5%

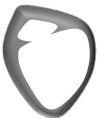

20%

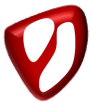

15%

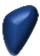

10%

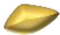

25%

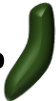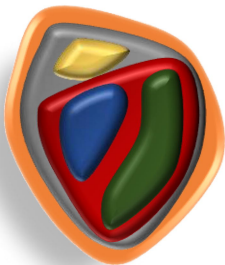**B**

100%

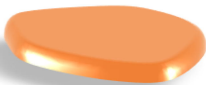

75%

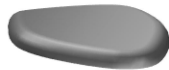

60%

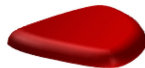

15%

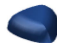

10%

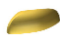

25%

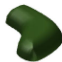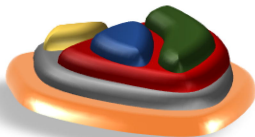

**A**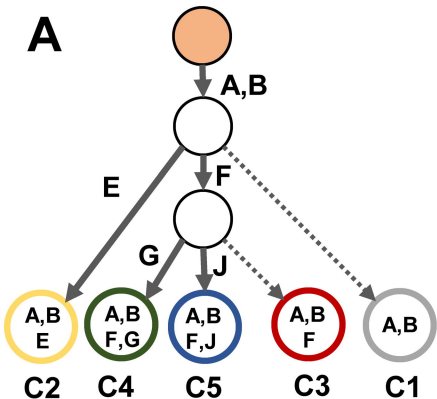

$$\begin{array}{c}
 \text{C1} \\
 \text{C2} \\
 \text{C3} \\
 \text{C4} \\
 \text{C5}
 \end{array}
 \begin{bmatrix}
 1 & 1 & 1 & 1 & 1 \\
 0 & 1 & 0 & 0 & 0 \\
 0 & 0 & 1 & 1 & 1 \\
 0 & 0 & 0 & 1 & 0 \\
 0 & 0 & 0 & 0 & 1
 \end{bmatrix}
 \times
 \begin{array}{c}
 \text{SCP} \\
 5\% \\
 20\% \\
 10\% \\
 25\% \\
 15\%
 \end{array}
 =
 \begin{array}{c}
 \text{MCP} \\
 75\% \\
 20\% \\
 50\% \\
 25\% \\
 15\%
 \end{array}$$

**B**

| Clone (SCP) | Locus |     |    |    |     |     |     |    |    |     |
|-------------|-------|-----|----|----|-----|-----|-----|----|----|-----|
|             | A     | B   | C  | D  | E   | F   | G   | H  | I  | J   |
| C1 (5%)     | 3     | 1   | 2  | 2  | 2   | 2   | 2   | 2  | 2  | 2   |
| C2 (20%)    | 3     | 1   | 2  | 2  | 0   | 2   | 2   | 2  | 2  | 2   |
| C3 (10%)    | 3     | 1   | 2  | 2  | 2   | 4   | 2   | 2  | 2  | 2   |
| C4 (25%)    | 3     | 1   | 2  | 2  | 2   | 4   | 0   | 2  | 2  | 2   |
| C5 (15%)    | 3     | 1   | 2  | 2  | 2   | 4   | 2   | 2  | 2  | 3   |
| <b>MCP</b>  | 75%   | 75% | 0% | 0% | 20% | 50% | 25% | 0% | 0% | 15% |

**C**

| Copy number state     | MCP        |          |          |          |          |
|-----------------------|------------|----------|----------|----------|----------|
|                       | r1 (75%)   | r2 (50%) | r3 (25%) | r4 (20%) | r5 (15%) |
| 0-copy                |            |          |          | E        | J        |
| 1-copy                | B          |          |          |          |          |
| 2-copy (Normal State) | C, D, H, I |          |          |          |          |
| 3-copy                | A          |          | G        |          |          |
| 4-copy                |            | F        |          |          |          |

Estimation

Amplification

0

0.0021

0.9363

Normal

0.0611

0.9958

0.0637

Deletion

0.9389

0.0021

0

Deletion

Normal

Amplification

Truth

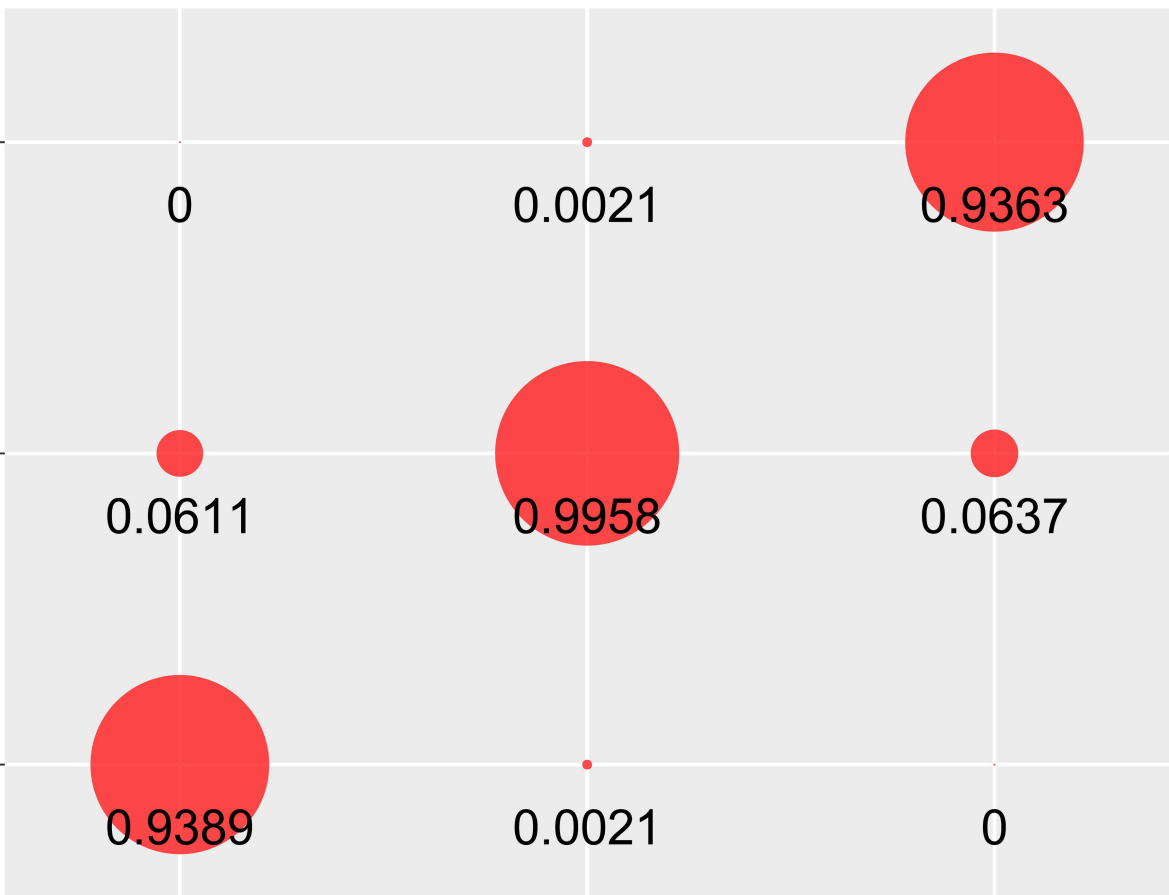

**A**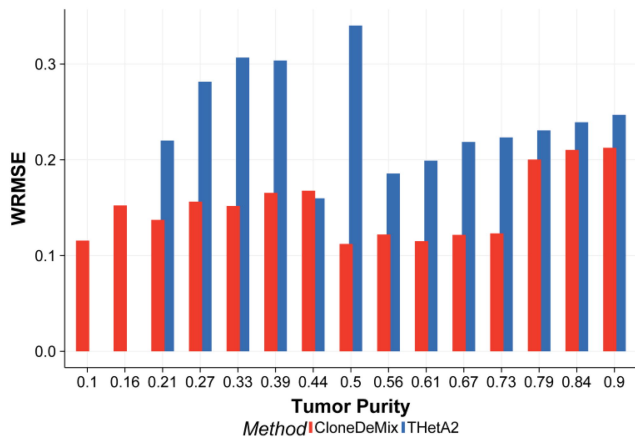**B**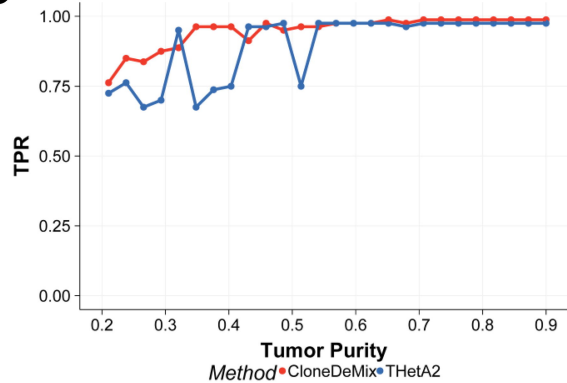**C**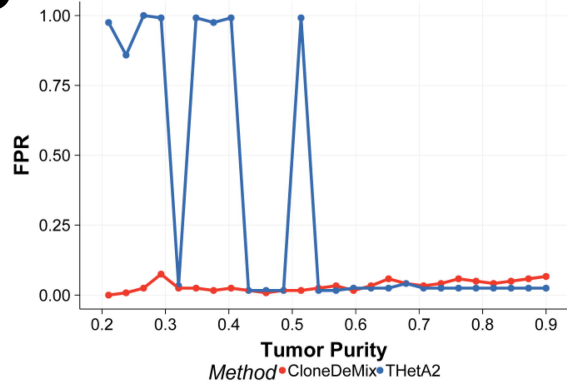

**A**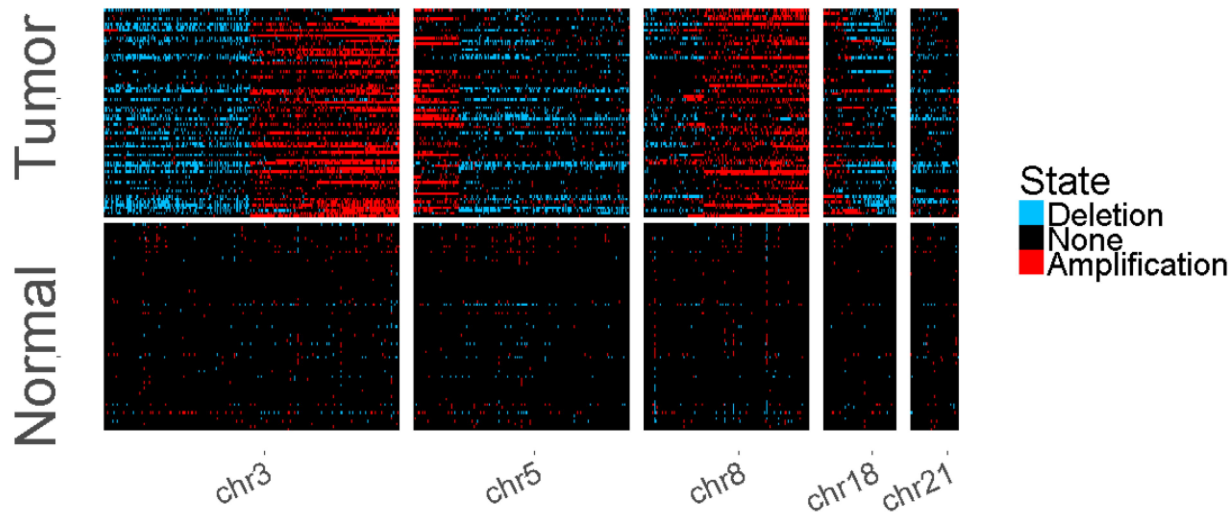**B**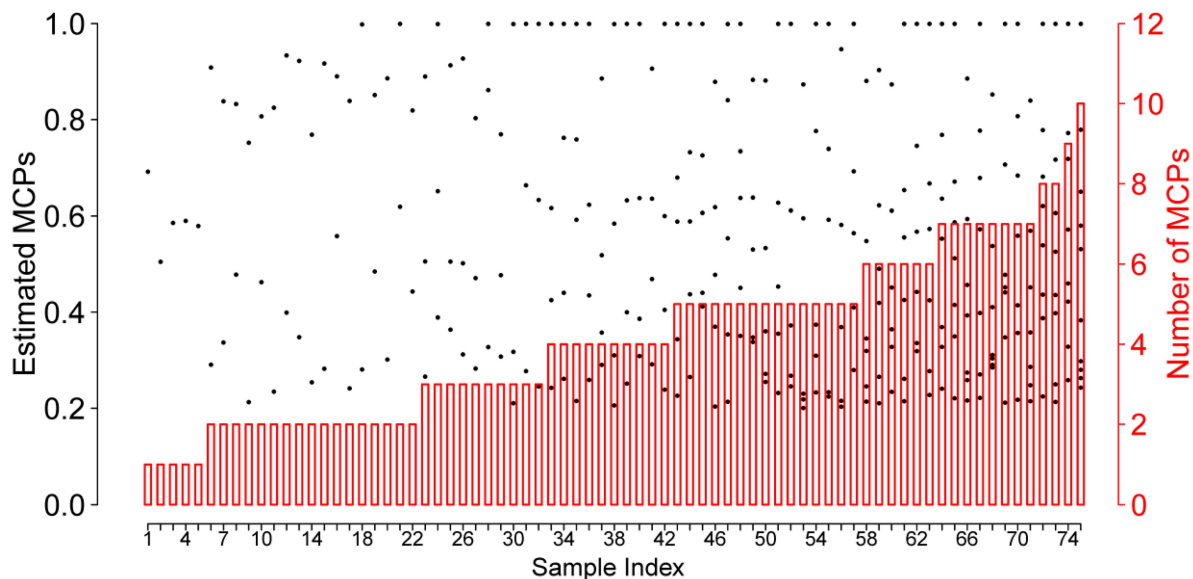

**A**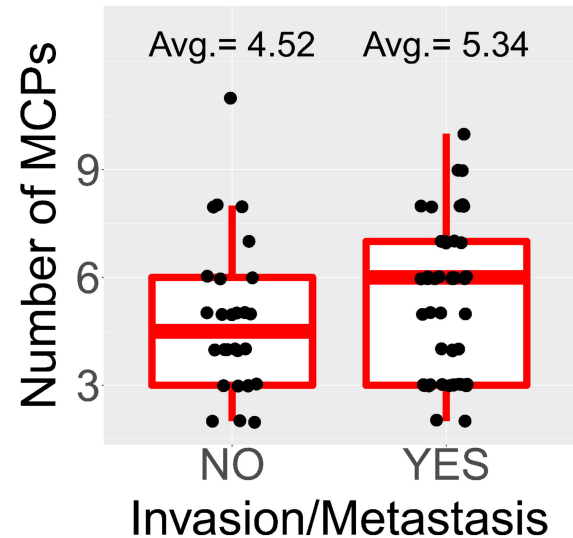**B**

|                         | <b>Clinical trait<br/>(Invasion/Metastasis)</b> |     |
|-------------------------|-------------------------------------------------|-----|
|                         | NO                                              | YES |
| Numb. of MCPs $\leq 4$  | 16                                              | 22  |
| Numb. of MCPs $> 5$     | 5                                               | 25  |
| Odds Ratio<br>(P-value) | 3.64<br>(p=0.029*)                              |     |

Strata Low Median High

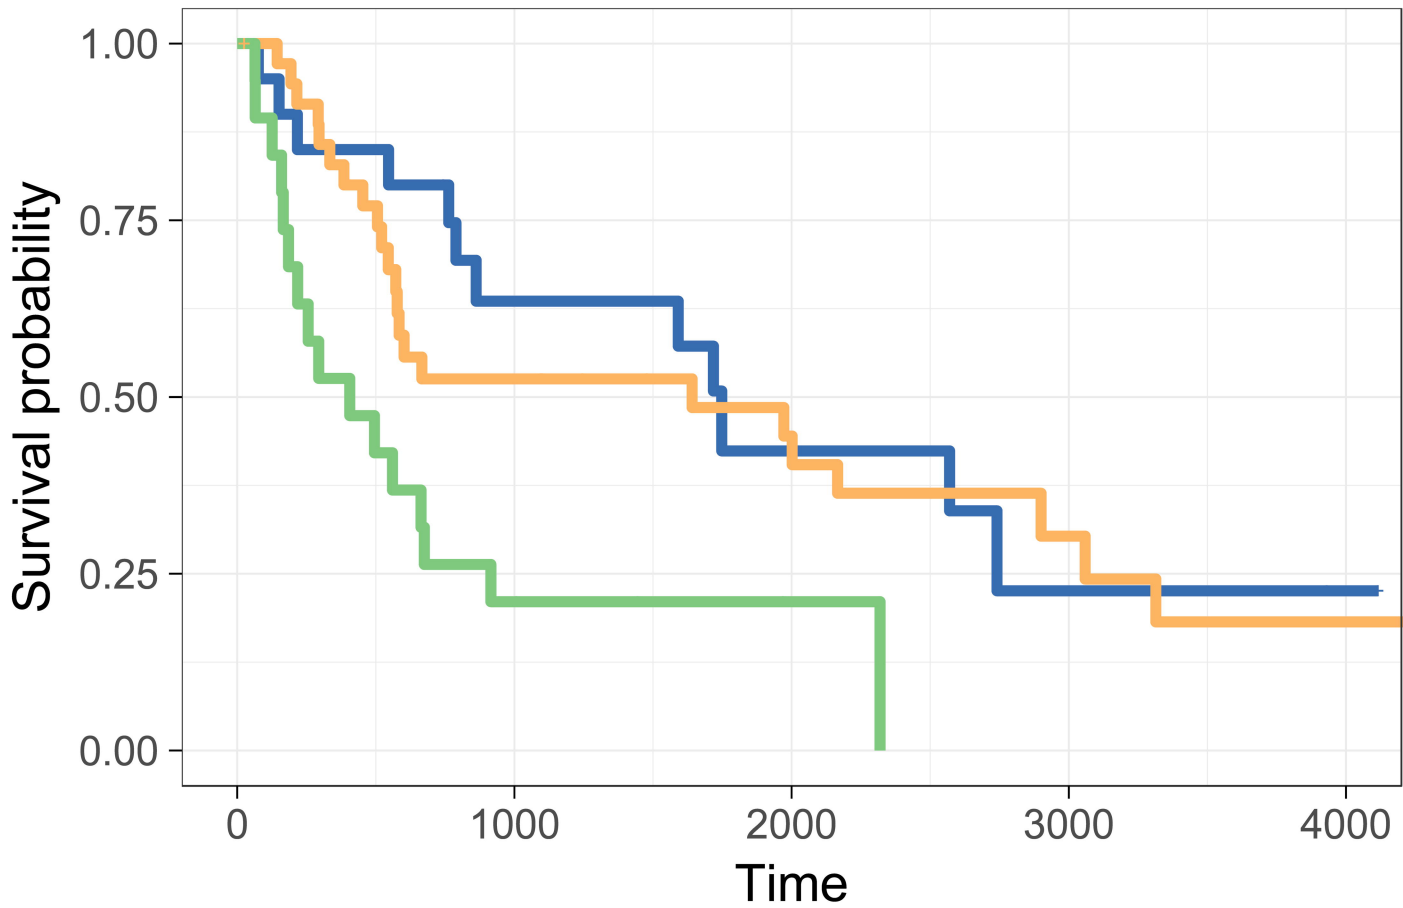

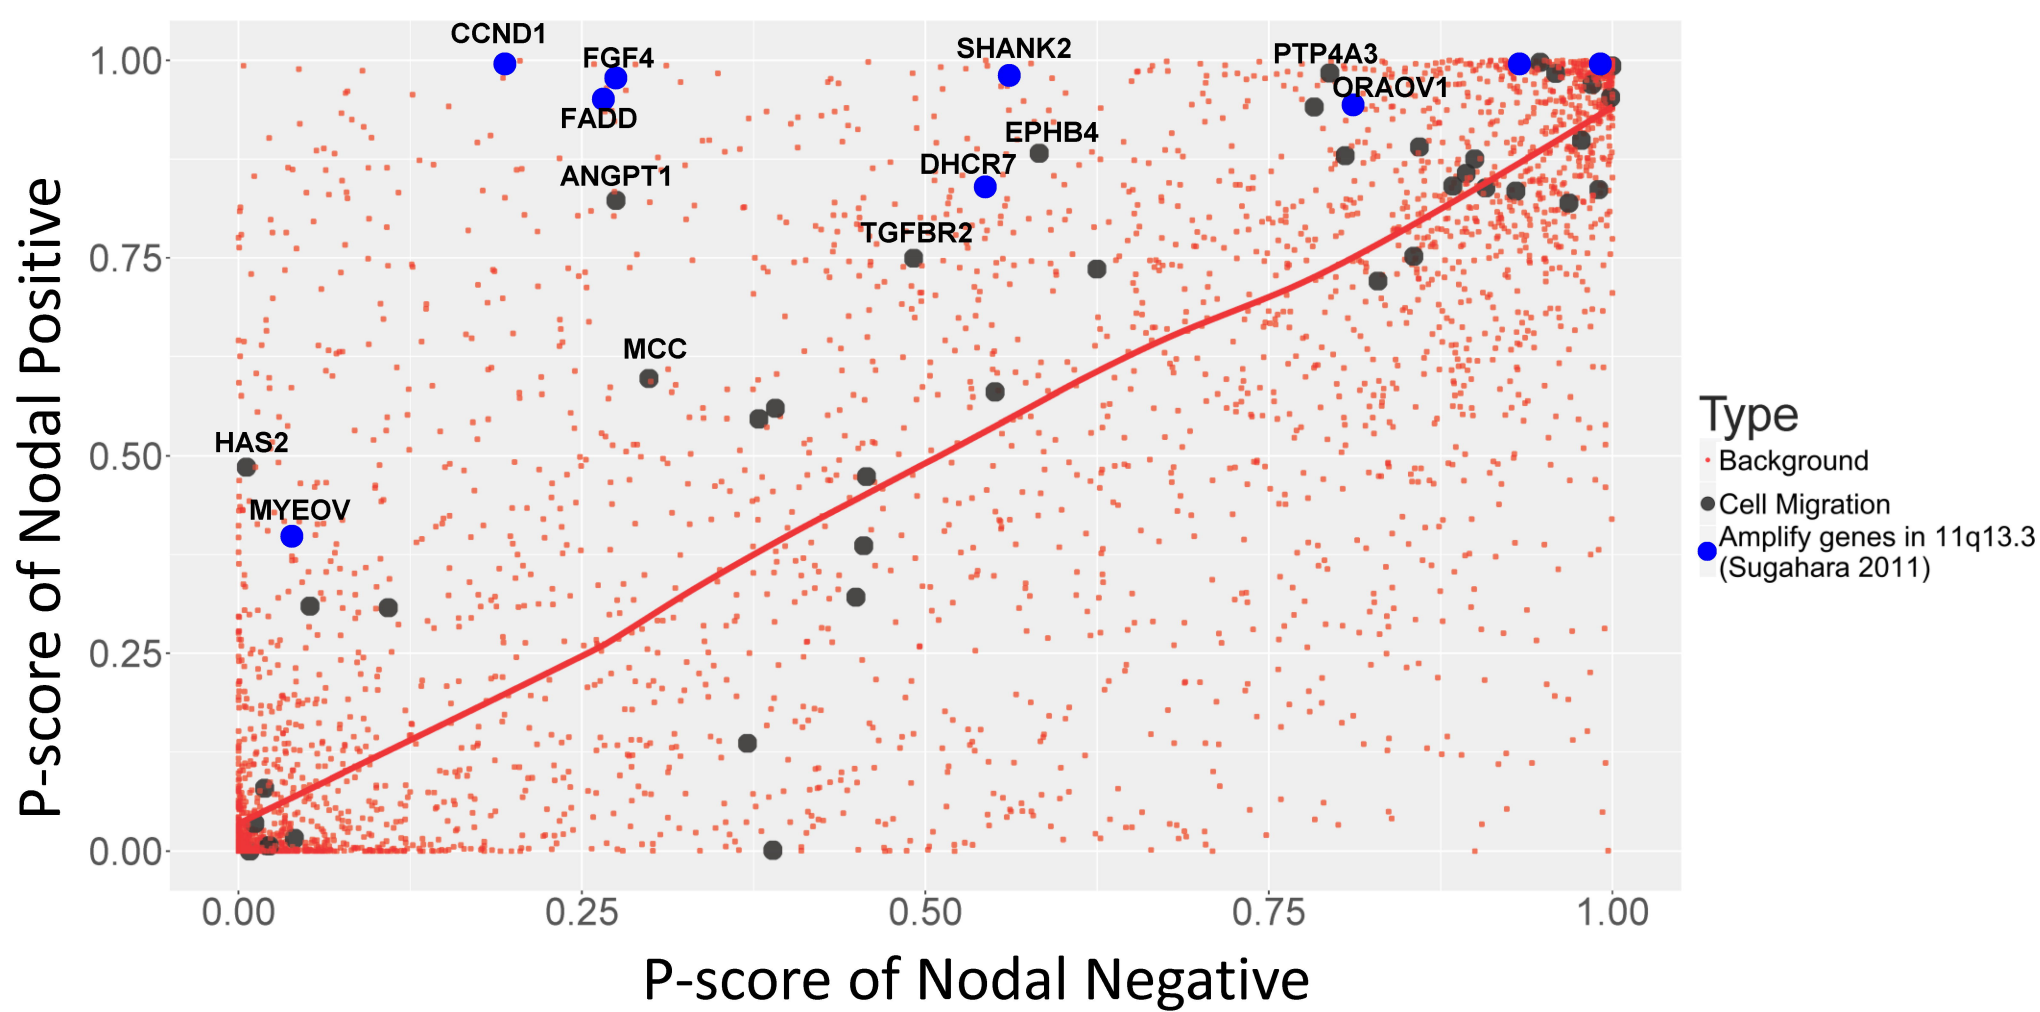



**Color Key**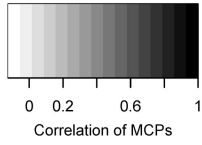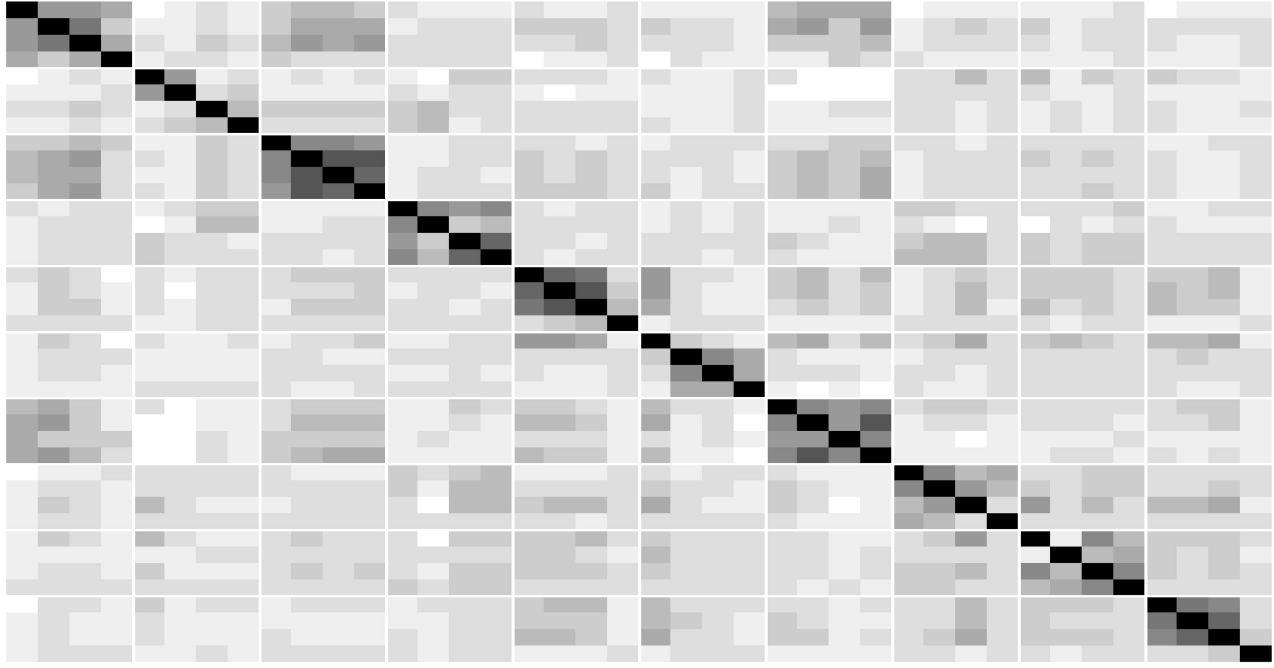

ECSS03 - t1  
 ECSS03 - t2  
 ECSS03 - t3  
 ECSS03 - t4

ECSS04 - t1  
 ECSS04 - t2  
 ECSS04 - t3  
 ECSS04 - t4

ECSS05 - t1  
 ECSS05 - t2  
 ECSS05 - t3  
 ECSS05 - t4

ECSS06 - t1  
 ECSS06 - t2  
 ECSS06 - t3  
 ECSS06 - t4

ECSS09 - t1  
 ECSS09 - t2  
 ECSS09 - t3  
 ECSS09 - t4

ECSS10 - t1  
 ECSS10 - t2  
 ECSS10 - t3  
 ECSS10 - t4

ECSS08 - t1  
 ECSS08 - t2  
 ECSS08 - t3  
 ECSS08 - t4

ECSS11 - t1  
 ECSS11 - t2  
 ECSS11 - t3  
 ECSS11 - t4

ECSS12 - t1  
 ECSS12 - t2  
 ECSS12 - t3  
 ECSS12 - t4

ECSS13 - t1  
 ECSS13 - t2  
 ECSS13 - t3  
 ECSS13 - t4

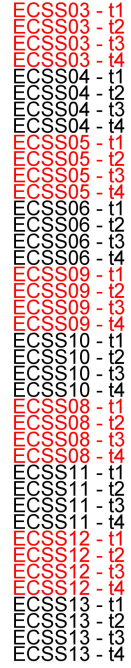

ECSS03 - t1  
 ECSS03 - t2  
 ECSS03 - t3  
 ECSS03 - t4  
 ECSS04 - t1  
 ECSS04 - t2  
 ECSS04 - t3  
 ECSS04 - t4  
 ECSS05 - t1  
 ECSS05 - t2  
 ECSS05 - t3  
 ECSS05 - t4  
 ECSS06 - t1  
 ECSS06 - t2  
 ECSS06 - t3  
 ECSS06 - t4  
 ECSS09 - t1  
 ECSS09 - t2  
 ECSS09 - t3  
 ECSS09 - t4  
 ECSS10 - t1  
 ECSS10 - t2  
 ECSS10 - t3  
 ECSS10 - t4  
 ECSS08 - t1  
 ECSS08 - t2  
 ECSS08 - t3  
 ECSS08 - t4  
 ECSS11 - t1  
 ECSS11 - t2  
 ECSS11 - t3  
 ECSS11 - t4  
 ECSS12 - t1  
 ECSS12 - t2  
 ECSS12 - t3  
 ECSS12 - t4  
 ECSS13 - t1  
 ECSS13 - t2  
 ECSS13 - t3  
 ECSS13 - t4

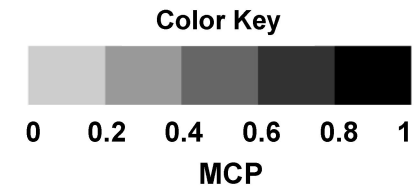

**ESCC-03**

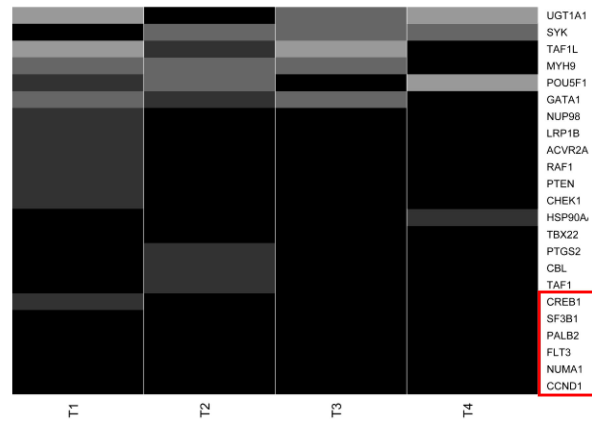

**ESCC-04**

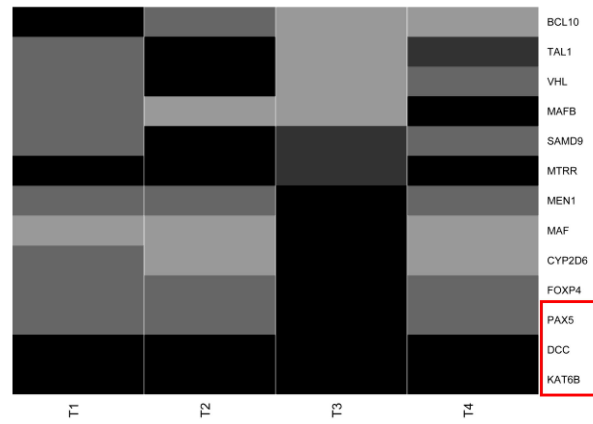

**ESCC-05**

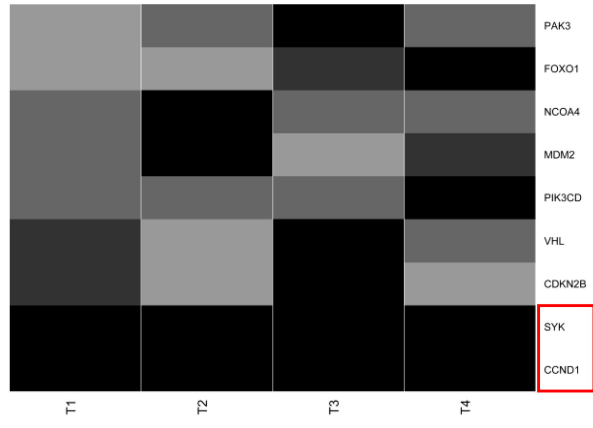

**ESCC-06**

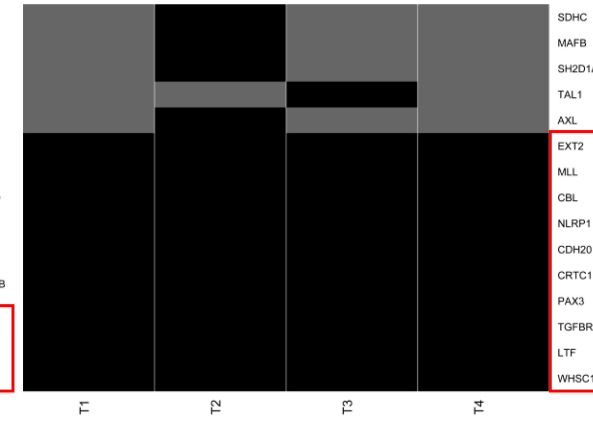

**ESCC-08**

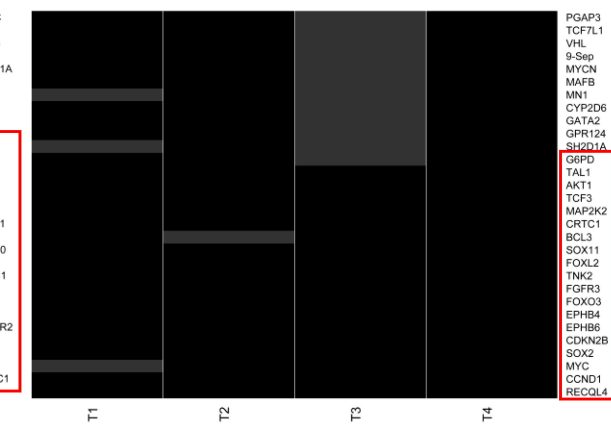

**ESCC-09**

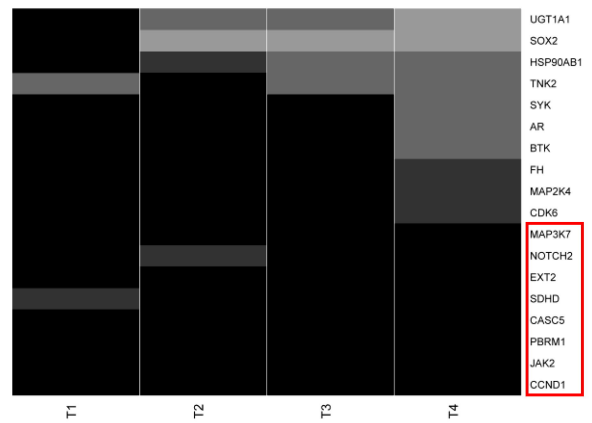

**ESCC-10**

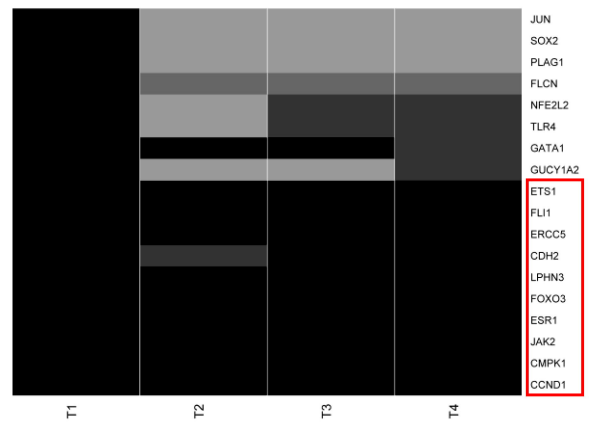

**ESCC-11**

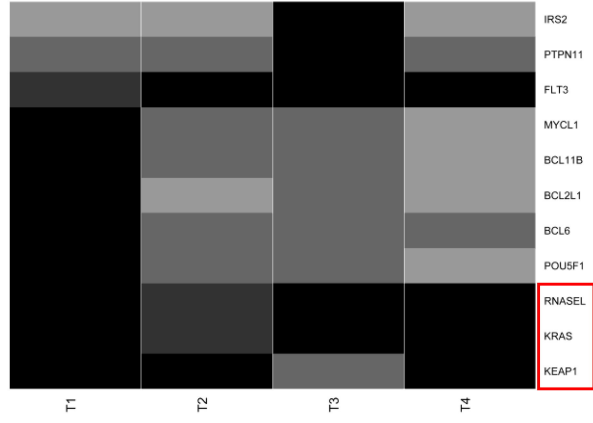

**ESCC-12**

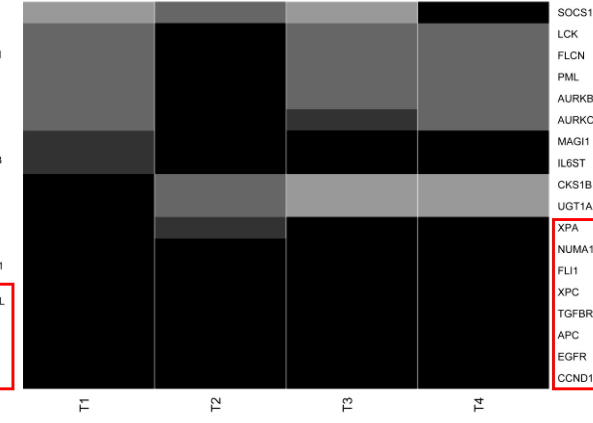

**ESCC-13**

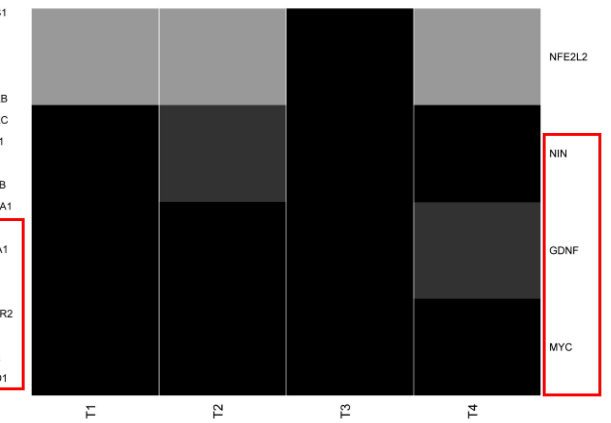

Source: https://www.biorxiv.org/content/10.1101/278887v2.full.pdf
